# Supplementary material for: Haemorheological and haemostatic alterations in coeliac disease and inflammatory bowel disease in comparison with non-coeliac, non-IBD subjects (HERMES): a case–control study protocol
Source: PubMed Central journal article supplement — BMJ Open. 2019 Mar 23;9(3):e026315. doi: 10.1136/bmjopen-2018-026315 (PMC6475350; doi:10.1136/bmjopen-2018-026315), 2019-03-23
Supplement: bmjopen-2018-026315.draft_revisions.pdf [file bmjopen-2018-026315.draft_revisions.pdf]

# BMJ Open

BMJ Open is committed to open peer review. As part of this commitment we make the peer review history of every article we publish publicly available.

When an article is published we post the peer reviewers' comments and the authors' responses online. We also post the versions of the paper that were used during peer review. These are the versions that the peer review comments apply to.

The versions of the paper that follow are the versions that were submitted during the peer review process. They are not the versions of record or the final published versions. They should not be cited or distributed as the published version of this manuscript.

BMJ Open is an open access journal and the full, final, typeset and author-corrected version of record of the manuscript is available on our site with no access controls, subscription charges or pay-per-view fees (<http://bmjopen.bmj.com>).

If you have any questions on BMJ Open's open peer review process please email [info.bmjopen@bmj.com](mailto:info.bmjopen@bmj.com)

# BMJ Open

## Hemorheological and hemostatic alterations in celiac disease and inflammatory bowel disease in comparison with non-celiac, non-IBD subjects (HERMES): A case-control study protocol

|                               |                                                                                                                                                                                                                                                                                                                                                                                                                                                                                                                                                                                                                                                                                                                                                                                                                                                                                                                                                                                                                                                                                                                                                                                                                                                                                                                                                                                                                                                                                                                                                                                                                                                                                                                                                                                                                                                                                                                                                                                                                                                                                                                                                                                                                                                                                                                                                                                                                     |
|-------------------------------|---------------------------------------------------------------------------------------------------------------------------------------------------------------------------------------------------------------------------------------------------------------------------------------------------------------------------------------------------------------------------------------------------------------------------------------------------------------------------------------------------------------------------------------------------------------------------------------------------------------------------------------------------------------------------------------------------------------------------------------------------------------------------------------------------------------------------------------------------------------------------------------------------------------------------------------------------------------------------------------------------------------------------------------------------------------------------------------------------------------------------------------------------------------------------------------------------------------------------------------------------------------------------------------------------------------------------------------------------------------------------------------------------------------------------------------------------------------------------------------------------------------------------------------------------------------------------------------------------------------------------------------------------------------------------------------------------------------------------------------------------------------------------------------------------------------------------------------------------------------------------------------------------------------------------------------------------------------------------------------------------------------------------------------------------------------------------------------------------------------------------------------------------------------------------------------------------------------------------------------------------------------------------------------------------------------------------------------------------------------------------------------------------------------------|
| Journal:                      | <i>BMJ Open</i>                                                                                                                                                                                                                                                                                                                                                                                                                                                                                                                                                                                                                                                                                                                                                                                                                                                                                                                                                                                                                                                                                                                                                                                                                                                                                                                                                                                                                                                                                                                                                                                                                                                                                                                                                                                                                                                                                                                                                                                                                                                                                                                                                                                                                                                                                                                                                                                                     |
| Manuscript ID                 | bmjopen-2018-026315                                                                                                                                                                                                                                                                                                                                                                                                                                                                                                                                                                                                                                                                                                                                                                                                                                                                                                                                                                                                                                                                                                                                                                                                                                                                                                                                                                                                                                                                                                                                                                                                                                                                                                                                                                                                                                                                                                                                                                                                                                                                                                                                                                                                                                                                                                                                                                                                 |
| Article Type:                 | Protocol                                                                                                                                                                                                                                                                                                                                                                                                                                                                                                                                                                                                                                                                                                                                                                                                                                                                                                                                                                                                                                                                                                                                                                                                                                                                                                                                                                                                                                                                                                                                                                                                                                                                                                                                                                                                                                                                                                                                                                                                                                                                                                                                                                                                                                                                                                                                                                                                            |
| Date Submitted by the Author: | 29-Aug-2018                                                                                                                                                                                                                                                                                                                                                                                                                                                                                                                                                                                                                                                                                                                                                                                                                                                                                                                                                                                                                                                                                                                                                                                                                                                                                                                                                                                                                                                                                                                                                                                                                                                                                                                                                                                                                                                                                                                                                                                                                                                                                                                                                                                                                                                                                                                                                                                                         |
| Complete List of Authors:     | <p>Szakács, Zsolt; Institute for Translational Medicine, University of Pécs Medical School; János Szentágothai Research Center, University of Pécs</p> <p>Csiszár, Beáta; Division of Cardiology and Angiology, First Department of Medicine, University of Pécs Medical School; János Szentágothai Research Center, University of Pécs</p> <p>Kenyeres, Péter; Division of Cardiology and Angiology, First Department of Medicine, University of Pécs Medical School; János Szentágothai Research Center, University of Pécs</p> <p>Sarlós, Patrícia; Division of Gastroenterology, First Department of Medicine, University of Pécs Medical School; János Szentágothai Research Center, University of Pécs</p> <p>Erőss, Bálint; Institute for Translational Medicine, University of Pécs Medical School; Division of Gastroenterology, First Department of Medicine, University of Pécs Medical School</p> <p>Hussain, Alizadeh; Division of Hematology, First Department of Medicine, University of Pécs Medical School; János Szentágothai Research Center, University of Pécs</p> <p>Nagy, Ágnes; Division of Hematology, First Department of Medicine, University of Pécs Medical School</p> <p>Kőszegi, Balázs; Department of Biochemistry and Medical Chemistry, University of Pécs Medical School</p> <p>Veczák, Ibolya; Division of Gastroenterology, First Department of Medicine, University of Pécs Medical School</p> <p>Farkas, Nelli; Institute of Bioanalysis, University of Pécs Medical School</p> <p>Bódis, Emőke; Institute for Translational Medicine, University of Pécs Medical School</p> <p>Márta, Katalin; Institute for Translational Medicine, University of Pécs Medical School; János Szentágothai Research Center, University of Pécs</p> <p>Szentesi, Andrea; Institute for Translational Medicine, University of Pécs Medical School</p> <p>Tőkés-Füzesi, Margit; Department of Laboratory Medicine, University of Pécs Medical School</p> <p>Berki, Tímea; Department of Immunology and Biotechnology, University of Pécs Medical School</p> <p>Vincze, Áron; Division of Gastroenterology, First Department of Medicine, University of Pécs Medical School; János Szentágothai Research Center, University of Pécs</p> <p>Toth, Kalman; Division of Cardiology and Angiology, First Department of Medicine, University of Pécs Medical School; János Szentágothai Research</p> |

1  
2  
3  
4  
5  
6  
7  
8  
9  
10  
11  
12  
13  
14  
15  
16  
17  
18  
19  
20  
21  
22  
23  
24  
25  
26  
27  
28  
29  
30  
31  
32  
33  
34  
35  
36  
37  
38  
39  
40  
41  
42  
43  
44  
45  
46  
47  
48  
49  
50  
51  
52  
53  
54  
55  
56  
57  
58  
59  
60

|           |                                                                                                                                                                                                                                                                                                 |
|-----------|-------------------------------------------------------------------------------------------------------------------------------------------------------------------------------------------------------------------------------------------------------------------------------------------------|
|           | Center, University of Pécs<br>Hegy, Péter; Institute for Translational Medicine, University of Pécs<br>Medical School; János Szentágothai Research Center, University of Pécs<br>Bajor, Judit; Division of Gastroenterology, First Department of Medicine,<br>University of Pécs Medical School |
| Keywords: | Inflammatory bowel disease < GASTROENTEROLOGY, Coeliac disease <<br>GASTROENTEROLOGY, thrombosis, hemorheology                                                                                                                                                                                  |
|           |                                                                                                                                                                                                                                                                                                 |

SCHOLARONE™  
Manuscripts

For peer review only

1 Hemorheological and hemostatic alterations in celiac disease and inflammatory bowel disease  
2 in comparison with non-celiac, non-IBD subjects (HERMES): A case-control study protocol

3  
4 Zsolt Szakács<sup>1,2</sup>, Beáta Csiszár<sup>2,3</sup>, Péter Kenyeres<sup>2,3</sup>, Patrícia Sarlós<sup>2,4</sup>, Bálint Eröss<sup>1,4</sup>,  
5 Alizadeh Hussain<sup>2,5</sup>, Ágnes Nagy<sup>5</sup>, Balázs Kőszegi<sup>6</sup>, Ibolya Veczák<sup>4</sup>, Nelli Farkas<sup>7</sup>, Emőke  
6 Bódis<sup>2</sup>, Katalin Márta<sup>1,2</sup>, Andrea Szentesi<sup>1</sup>, Margit Tőkés-Füzesi<sup>8</sup>, Tímea Berki<sup>9</sup>, Áron  
7 Vincze<sup>2,4</sup>, Kálmán Tóth<sup>2,3</sup>, Péter Hegyi<sup>1,2^</sup>, Judit Bajor<sup>4^</sup>

8  
9 <sup>1</sup>Institute for Translational Medicine, University of Pécs Medical School, Pécs, Hungary

10 <sup>2</sup>János Szentágotthai Research Center, University of Pécs, Pécs, Hungary

11 <sup>3</sup>Division of Cardiology and Angiology, First Department of Medicine, University of Pécs  
12 Medical School, Pécs, Hungary

13 <sup>4</sup>Division of Gastroenterology, First Department of Medicine, University of Pécs Medical  
14 School, Pécs, Hungary

15 <sup>5</sup>Division of Hematology, First Department of Medicine, University of Pécs Medical School,  
16 Pécs, Hungary

17 <sup>6</sup>Department of Biochemistry and Medical Chemistry, University of Pécs Medical School,  
18 Pécs, Hungary

19 <sup>7</sup>Institute of Bioanalysis, University of Pécs Medical School, Pécs, Hungary

20 <sup>8</sup>Department of Laboratory Medicine, University of Pécs Medical School, Pécs, Hungary

21 <sup>9</sup>Department of Immunology and Biotechnology, University of Pécs Medical School, Pécs,  
22 Hungary

23  
24 ^equal contributors

## 25 26 **Correspondence**

27 Name: Péter Hegyi, MD

28 Postal address: H-7624 Pécs, Szigeti út 12., Hungary

29 Email: [p.hegyi@tm-pte.org](mailto:p.hegyi@tm-pte.org)

30 Tel: +(36-72) 536-246

31  
32 **Word count (abstract):** 299/300

33 **Word count (text):** 2869

## 35 Abstract

## 37 Introduction

38 Hemorheological and hemostatic changes predispose to the development of arterial and  
39 venous thrombotic events; however, limited information is available on the status of these  
40 changes in celiac disease (CeD) and inflammatory bowel disease (IBD). In this study, we aim  
41 to describe the hemorheological and hemostatic profiles of CeD and IBD patients in a  
42 Hungarian cohort of patients to investigate whether any alterations contribute to elevated  
43 thrombotic risk.

## 44 Methods and analysis

45 This is a case-control study involving newly diagnosed and followed CeD and IBD  
46 patients with age- and sex-matched non-CeD, non-IBD subjects with an allocation ratio of  
47 1:1:1.

48 After informed consent is obtained, a detailed medical history will be collected, including  
49 venous and arterial thrombotic risk factors and medications. Symptoms in CeD patients will  
50 be assessed with the Gastrointestinal Symptoms Rating Scale, and disease activity in IBD  
51 patients will be determined by calculating the Mayo Score or Crohn's Disease Activity Index.  
52 A single trained dietitian will assess dietary adherence among CeD patients with a thorough  
53 interview together with a measurement of self-reported adherence, dietary knowledge, and  
54 urine analysis (detection of gluten immunogenic peptides). In addition to routine laboratory  
55 parameters, hemorheological (i.e., erythrocyte deformability and aggregation, viscosity of  
56 whole blood and plasma) and hemostatic parameters (e.g., protein C, protein S, and  
57 antithrombin) with immunological indicators (i.e., celiac-specific serology and  
58 antiphospholipid antibodies) will be measured from venous blood for every participant.

59 Primary and secondary outcomes will be hemorheological and hemostatic parameters,  
60 respectively. Univariate and multivariate statistics will be used to compare CeD and IBD  
61 patients to control subjects. Subgroup analysis will be performed by disease activity.

## 62 Ethics and dissemination

63 The study was approved by the Regional and Local Research Ethics Committee,  
64 University of Pécs (Ref No 6917). Findings will be disseminated at research conferences and  
65 in peer-reviewed journals.

## 66 Trial registration

67 ISRCTN49677481.

68

1  
2  
3  
4  
5  
6  
7  
8  
9  
10  
11  
12  
13  
14  
15  
16  
17  
18  
19  
20  
21  
22  
23  
24  
25  
26  
27  
28  
29  
30  
31  
32  
33  
34  
35  
36  
37  
38  
39  
40  
41  
42  
43  
44  
45  
46  
47  
48  
49  
50  
51  
52  
53  
54  
55  
56  
57  
58  
59  
60

69 **Key words:** celiac disease, inflammatory bowel disease, hemorheology, thrombosis

70

### 71 **Strengths and limitations of this study**

- 72 • Immune-mediated bowel diseases are associated with an increased risk of arterial and  
73 venous thrombosis, but specific hemorheological and hemostatic alterations are  
74 understudied in celiac disease and incomplete in inflammatory bowel disease.
- 75 • This case-control study prospectively recruits newly diagnosed and followed-up cases  
76 of celiac disease and inflammatory bowel disease with age- and sex-matched controls  
77 (the allocation ratio will be 1:1:1, respectively) to investigate clinical and laboratory  
78 alterations predisposing to thrombosis.
- 79 • Laboratory tests include the measurement of hemorheological (i.e., erythrocyte  
80 aggregation and deformability, plasma and whole blood viscosity), hemostatic  
81 parameters (e.g., levels of fibrinogen, prothrombin time, protein C, protein S, and  
82 antithrombin), and immunological indicators (e.g., celiac-specific serology and  
83 antiphospholipid antibodies).
- 84 • Patients will be divided by disease activity into active and inactive.
- 85 • Results should be interpreted with caution due to the single-centre nature and case-  
86 control design of the study.

## 88 **INTRODUCTION**

89 Immune-mediated disorders may affect 5–7% of the population.[1] These disorders  
90 frequently share pathways in pathogenesis as well as organ manifestations. Celiac disease  
91 (CeD) and inflammatory bowel disease (IBD) are systemic immune-mediated disorders,  
92 primarily affecting the intestines.[2] Both are significant contributors to the load on  
93 gastroenterological out-patient clinics due to various diagnostic issues and lifelong follow-  
94 up.[3]

### 96 **CeD and IBD**

97 Global prevalence of biopsy-confirmed CeD is around 0.8%.[4] Genetic (HLADQ2 or  
98 DQ8 haplotypes) and environmental factors (ingestion of gluten) play a crucial role in disease  
99 development and during the course of the disease. Strict adherence to a lifelong gluten-free  
100 diet (GFD) results in symptom relief and a significant reduction in disease complications.[5]

1  
2  
3 101 IBDs are less frequent entities: the increasing prevalence of ulcerative colitis and Crohn's  
4 102 disease may reach 0.5% and 0.3% in Europe, respectively.[6, 7] In addition to genetic  
5 103 vulnerability, environmental factors and immune dysregulation are important contributors to  
6 104 disease pathogenesis.[8] Although the pharmacological approach has been improved  
7 105 significantly, treatment imposes a great burden on patients as well as on the healthcare  
8 106 system.[7, 9]  
9  
10  
11  
12  
13

### 14 108 **Thrombosis and immune-mediated disorders**

15  
16 109 Immune-mediated disorders are often characterized by an increased risk of venous and  
17 110 arterial thrombotic events.[10-14] The importance of these events is highlighted by the fact  
18 111 that myocardial infarction, stroke, and venous thrombosis (deep venous thrombosis and  
19 112 pulmonary embolism) are the three most common life-threatening cardiovascular  
20 113 disorders.[15] Patients with atherosclerotic complications carry an increased risk of venous  
21 114 thrombosis, and, conversely, venous thrombosis predisposes to the development of  
22 115 atherosclerotic complications.[16-18] Mechanisms of thrombophilia in immune-mediated  
23 116 disorders are complex, and acquired factors seem important.[19]  
24  
25  
26  
27  
28

29 117 Clinical presentation of CeD-associated hypercoagulability includes a wide variety of  
30 118 thrombosis at venous sites, pulmonary embolism, atheroembolism (stroke), and obstetric  
31 119 complications.[20] The multifactorial etiology of thrombosis may embrace the interplay of  
32 120 malabsorption (vitamin and mineral deficiencies, e.g., vitamin B<sub>12</sub> and K deficiency),  
33 121 thrombophilic autoantibodies (anti-tissue transglutaminase (tTG) and antiphospholipid  
34 122 antibodies), hyperhomocysteinemia, endothelial dysfunction, accelerated atherosclerosis,  
35 123 thrombocyte dysfunction, and genetics.[20-24] Immune-mediated comorbidities  
36 124 ('autoimmune traits'), such as antiphospholipid syndrome, may contribute to the elevated  
37 125 thrombotic risk as well.[24] In addition, ingestion of trace amounts of gluten may maintain a  
38 126 continuous pro-inflammatory response.[25]  
39  
40  
41  
42  
43  
44

45 127 IBD is associated with venous thrombosis and pulmonary embolism as well as with the  
46 128 cardiovascular consequences of atherosclerosis, i.e., stroke and myocardial infarction.[26, 27]  
47 129 The increased risk of thrombosis in IBD can be attributed to immobilization, surgical  
48 130 interventions, glucocorticoid therapy, vitamin deficiencies, hyperhomocysteinemia, and  
49 131 chronic inflammation alone or in conjunction with the factors above.[28, 29] In the case of  
50 132 IBD, disease activity may be a crucial determinant of thrombotic risk.[27]  
51  
52  
53  
54  
55

### 56 134 **Thrombosis in hemorheological and hemostatic aspects**

57  
58  
59  
60

1  
2  
3 135 Rheological properties of blood can be described by specific laboratory measures,  
4 136 including plasma viscosity, blood viscosity, erythrocyte deformability, and erythrocyte  
5 137 aggregability. An altered hemorheological profile contributes to the development of arterial  
6 138 thrombotic events, such as myocardial infarction and stroke.[30-33] In addition, red blood  
7 139 cells and fibrinogen are suspected to be involved in the formation of venous thrombi ('red  
8 140 clots').[34]

9  
10  
11  
12 141 Epidemiological studies indicate that arterial and venous coagulopathies are frequently  
13 142 associated with altered levels or function of pro- and anticoagulant proteins (including  
14 143 antithrombin, protein C, and protein S), altered activity of clotting factors, abnormal thrombin  
15 144 generation, and endothelial damage.[35]

16  
17  
18  
19 145 Reports indicate that immune-mediated disorders may be associated with  
20 146 hemorheological[36-38] and hemostatic changes[39-41], thereby contributing to the increased  
21 147 risk of thrombotic events.  
22  
23

24 148

#### 25 149 **Prothrombotic hemorheological and hemostatic changes in CeD and IBD**

26  
27 150 No studies have assessed the hemorheological changes in CeD. There are sporadic reports  
28 151 on activity-dependent prothrombotic hemorheological changes in IBD. However, while  
29 152 individual studies have focused on single outcomes of laboratory parameters, none of them  
30 153 have assessed the complete hemorheological profile of patients.[42-45]

31  
32  
33 154 There has only been one retrospective publication that examined the link between CeD and  
34 155 hemostatic alterations in a small cohort of patients: sporadic cases of protein C and protein S  
35 156 deficiency (due to vitamin K malabsorption), hyperhomocysteinemia, and antiphospholipid  
36 157 antibodies were identified.[22] In IBD patients, a significant decline in anticoagulant  
37 158 mechanism is well-established.[46-49]

38  
39  
40  
41 159

#### 42 160 **Scope and objectives**

43  
44  
45 161 No studies have assessed hemorheological and hemostatic parameters within a study to  
46 162 provide an overall view of thrombotic risk. Since our knowledge of hemorheological and  
47 163 hemostatic changes is limited in CeD and IBD, this study aims to carry out a comprehensive  
48 164 evaluation of venous and arterial prothrombotic alterations in these pro-inflammatory diseases  
49 165 in a Hungarian cohort of patients.

##### 50 166 1. Primary objective

- 51  
52  
53  
54 167
  - to assess the hemorheological profile of CeD and IBD patients, compared to non-

55 168 CeD, non-IBD subjects



## 169 2. Secondary objective

- 170 • to assess the hemostatic profile of CeD and IBD patients, compared to non-CeD,  
171 non-IBD subjects

172 Our results can contribute to expanding our knowledge on the prothrombotic  
173 pathophysiological alteration in CeD and IBD, thereby providing the basis for future research  
174 on the indications of thromboprophylaxis under special prothrombotic circumstances, such as  
175 hospitalization, pregnancy, or immobilization.

176

177 **METHODS AND ANALYSIS**

178

179 **Design**

180 This is a case-control study with prospective recruitment of CeD and IBD patients with  
181 non-CeD, non-IBD control subjects. The study does not change the routine management of  
182 subjects included (for the World Health Organization checklist, see Table 1). The study  
183 protocol was planned in accordance with the SPIRIT 2013 Statement.[50]

184

185 Table 1. World Health Organization checklist

| Data category                                 | Information                                                                                                                                                                                                                                                                                                                                                                                                               |
|-----------------------------------------------|---------------------------------------------------------------------------------------------------------------------------------------------------------------------------------------------------------------------------------------------------------------------------------------------------------------------------------------------------------------------------------------------------------------------------|
| Primary registry and trial identifying number | ISRCTN49677481                                                                                                                                                                                                                                                                                                                                                                                                            |
| Date of registration in primary registry      | 05/03/2018                                                                                                                                                                                                                                                                                                                                                                                                                |
| Secondary identifying numbers                 | None                                                                                                                                                                                                                                                                                                                                                                                                                      |
| Source(s) of monetary or material support     | University of Pécs Medical School; Momentum Grant from the Hungarian Academy of Sciences (LP2014-10/2014); Highly Cited Publication Grant (KH 125678) from the National Research Development and Innovation Office; GINOP 2.3.2-15-2016-00048 Stay Alive and EFOP 3.6.2-16-2017-00006 Live Longer; Translational Medicine Foundation; and New National Excellence Programme, Ministry of Human Capacities (ÚNKP-17-3-II). |
| Primary sponsor                               | None                                                                                                                                                                                                                                                                                                                                                                                                                      |
| Secondary sponsor(s)                          | None                                                                                                                                                                                                                                                                                                                                                                                                                      |
| Contact for public queries                    | Zsolt Szakács, MD, szakacs.zsolt@pte.hu                                                                                                                                                                                                                                                                                                                                                                                   |
| Contact for scientific queries                | Judit Bajor, MD, bajor.judit@pte.hu                                                                                                                                                                                                                                                                                                                                                                                       |
| Public title                                  | Investigation of hemorheological and hemostatic alterations in celiac disease and inflammatory bowel disease in comparison with healthy subjects: A case-control study (HERMES)                                                                                                                                                                                                                                           |
| Scientific title                              | Hemorheological and hemostatic alterations in celiac disease and inflammatory bowel disease in comparison with non-celiac, non-IBD subjects: A case-control study (HERMES)                                                                                                                                                                                                                                                |
| Countries of recruitment                      | Hungary                                                                                                                                                                                                                                                                                                                                                                                                                   |

|                                           |                                                                                                                                                                                                                                                                            |
|-------------------------------------------|----------------------------------------------------------------------------------------------------------------------------------------------------------------------------------------------------------------------------------------------------------------------------|
| Health condition(s) or problem(s) studied | Celiac disease and inflammatory bowel disease                                                                                                                                                                                                                              |
| Intervention(s)                           | Questionnaires (thrombophilia, dietary adherence, disease activity), urine collection (dietary adherence - urine-gluten immunogenic peptide detection), blood collection (hemorheological, hemostatic, and immunological tests complemented with routine laboratory panel) |
| Key inclusion and exclusion criteria      | Inclusion criteria: adult patients ( $\geq 18$ years of age) suffering from newly diagnosed or treated celiac disease (by ESPGHAN and ACG guidelines), or from inflammatory bowel disease (by ECCO guidelines), and non-celiac, non-IBD subjects                           |
|                                           | Exclusion criteria: chronic diseases (chronic kidney diseases, liver cirrhosis, heart failure, active malignant diseases), acute diseases within 2 weeks of inclusion                                                                                                      |
| Study type                                | Observational                                                                                                                                                                                                                                                              |
| Date of first enrolment                   | 30/5/2018                                                                                                                                                                                                                                                                  |
| Target sample size                        | First phase: 50 celiac and 50 IBD patients plus control (1–3 for each patient). Second phase: target number is determined by power calculation.                                                                                                                            |
| Recruitment status                        | Ongoing                                                                                                                                                                                                                                                                    |
| Primary outcome(s)                        | Hemorheological test results                                                                                                                                                                                                                                               |
| Key secondary outcomes                    | Hemostatic test results                                                                                                                                                                                                                                                    |

186

### 187 **Trial organization and steering committee**

188 The Centre for Translational Medicine at the University of Pécs, which was established to  
 189 advance medical research in gastroenterology, is the coordinator and designer of the  
 190 HERMES study. The centre is experienced in running investigator-initiated clinical trials.[51]  
 191 A steering committee will be set up to supervise the entire study process. The Principal  
 192 Investigator (JB) and the Trial Coordinator (ZS) are responsible for organizing patient  
 193 recruitment, data collection, sample collection, shipping, and storage, biochemical analysis,  
 194 and the publication of study results.

195

### 196 **Population and eligibility**

197 We will include CeD patients, IBD patients, and non-CeD, non-IBD control subjects.

198 Eligibility criteria will be as follows:

199 a. Inclusion criteria (applies to all subjects)

200 ➤ Blood collection must be indicated with medical conditions

201 ➤ Signed informed consent

202 b. Inclusion criteria (applies to specific cohorts of patients)

- 1  
2  
3 203           ➤ CeD patients: newly diagnosed or followed patients (with or without adhering to  
4 204           GFD) aged  $\geq 18$  years; the establishment of a diagnosis should meet the current  
5 205           guidelines (ESPHGAN, ACG).[5, 52]  
6  
7 206           ➤ IBD patients: newly diagnosed or followed-up patients (with active or remitting  
8 207           disease) aged  $\geq 18$  years (not following GFD); the establishment of a diagnosis  
9 208           should meet the current guidelines (ECCO).[53, 54]  
10  
11 209           ➤ Non-CeD, non-IBD control subjects: individuals aged  $\geq 18$  years (not following  
12 210           GFD) in whom CeD and IBD can be excluded according to the recent  
13 211           guidelines. [5, 52-54]  
14  
15  
16  
17 212       c. Exclusion criteria (applies to all subjects)  
18  
19 213           ➤ Chronic conditions:  
20  
21 214               ➤ Estimated glomerular filtration rate calculated with CKD-EPI formula is  
22 215                $< 60 \text{ ml/min/1.73m}^2$  (CKD3 or more severe kidney failure)  
23  
24 216               ➤ Liver cirrhosis in Child–Pugh B–C  
25 217               ➤ Heart failure (NYHA III–IV)  
26 218               ➤ Active malignant diseases  
27  
28 219           ➤ Any acute diseases or invasive procedures within two weeks of recruitment (e.g.,  
29 220           systemic infection, surgery, or major trauma)  
30  
31 221           ➤ Pregnancy  
32  
33 222           ➤ Patients unable to understand the essentials of the informed consent  
34

### 223 **Flow and timing**

35  
36  
37 224       All subjects at our academic hospital for a planned check-up or referred to the center for  
38 225       diagnostic purposes will be recruited consecutively. The place of recruitment will be the  
39 226       Division of Gastroenterology, First Department of Medicine, University of Pécs Medical  
40 227       School. This tertiary centre provides professional gastroenterological care for about 300,000  
41 228       inhabitants in Baranya County, Hungary.

42  
43  
44  
45 229       Recruitment of the study population will be managed in two phases (see ‘Target number of  
46 230       patient’ section), with the expected recruiting period being between May 2018 and May 2019  
47 231       (covering one year). Table 2 shows the timeline of the study. Patients will be provided with an  
48 232       information sheet and must provide written consent before sampling. Informed consent will  
49 233       be obtained by personnel with a medical degree. Participants may withdraw from the study for  
50 234       any reason at any time. Consent forms and other related documents will be accessible at  
51 235       <https://tm-centre.org>.

52  
53  
54  
55  
56 236

237 Table 2. Schedule for the study

| TIME POINT                          | Study period |            |                 |           |         |
|-------------------------------------|--------------|------------|-----------------|-----------|---------|
|                                     | Enrolment    | Allocation | Post-allocation |           |         |
|                                     | -1 hour      | 0          | +1 hour         | +1.5 hour | +2 hour |
| <b>ENROLMENT:</b>                   |              |            |                 |           |         |
| Eligibility screen                  | x            |            |                 |           |         |
| Informed consent                    | x            |            |                 |           |         |
| Allocation                          |              | x          |                 |           |         |
| <b>INTERVENTION:</b>                |              |            |                 |           |         |
| Interview and questionnaire         |              |            | x               |           |         |
| Urine collection                    |              |            |                 | x         |         |
| Blood collection                    |              |            |                 | x         |         |
| <b>ASSESSMENT</b>                   |              |            |                 |           |         |
| Symptom scores and disease activity |              |            | x               |           |         |
| Thrombophilia questionnaire         |              |            | x               |           |         |
| Dietary adherence                   |              |            | x               |           |         |
| Blood analysis <sup>#</sup>         |              |            |                 |           | x       |
| Urine analysis <sup>#</sup>         |              |            |                 |           | =>*     |

238

239 \* samples will be deep frozen until all participants have been recruited

240 <sup>#</sup>after analysis, blood and urine residues will be stored in the biobank

241

242 Patients will be monitored by our professional data management team throughout the entire  
 243 process of data and biological sample collection to ensure perfect adherence to protocol.  
 244 Written feedback will be provided to patients on the results of the laboratory tests and dietary  
 245 evaluation. If findings indicate, patients will be referred to their general practitioners or a  
 246 specialist for further investigation and management.

247

248 **Measurements**

249 All samples will be collected and questionnaires will be administered within two hours  
 250 after allocation. Actions for each group are defined and listed in Table 3.

251

252 Table 3. Actions within study

|                                           | CeD patients | IBD patients | Control subjects |
|-------------------------------------------|--------------|--------------|------------------|
| Thrombophilia questionnaire               | +            | +            | +                |
| GSRS                                      | +            | -            | +                |
| Dietary interview and GFD adherence tests | +            | -            | +                |
| Mayo Score/CDAI                           | -            | +            | +                |

258

259

260

|                          |   |   |   |
|--------------------------|---|---|---|
| Urine GIP detection      | + | - | + |
| Laboratory measures      |   |   |   |
| routine parameters       | + | + | + |
| hemorheology             | + | + | + |
| hemostasis               | + | + | + |
| immunological indicators | + | + | + |

253

254 CeD: celiac disease; CDAI: Crohn's Disease Activity Index; GFD: gluten-free diet; GIP:  
255 gluten-immunogenic peptides; GSRS: Gastrointestinal Symptoms Rating Scale; IBD:  
256 inflammatory bowel disease

257

258 Detailed history (including medications for preceding three months) and risk factors of  
259 venous and arterial thrombotic events will be covered with a 15-minute thrombophilia  
260 questionnaire (administered by a person with a medical degree).

261 The Gastrointestinal Symptoms Rating Scale is a tool designed to assess the severity of  
262 gastrointestinal symptoms on a scale of 1 to 7 (administered by a person with a medical  
263 degree).[55]

264 Disease activity in IBD will be estimated with either the (modified) Mayo Score[56] or  
265 Crohn's Disease Activity Index[57] in patients with ulcerative colitis and Crohn's disease,  
266 respectively, while tissue transglutaminase (tTG) levels will be used to measure the activity of  
267 CeD. (Scores will be determined by the gastroenterologist enrolling the patient.)

268 Dietary adherence of CeD patients will be estimated through (1) a dietary interview  
269 conducted by a trained dietitian on a scale of 1 to 10, (2) self-reporting,[58] (3) a test  
270 measuring knowledge of gluten-free foods, (4) urine GIP detection (details in the text), and  
271 (5) celiac-specific serology (tTG and endomysium antibody levels (EMA)).

272 All laboratory tests will be performed in the same laboratory (University of Pécs, Hungary)  
273 from venous blood. Blood samples will be collected in plastic tubes prospectively (2 x BD  
274 Vacutainer 10.0 ml (red), 2 x BD Vacutainer 6.0 ml (purple), 1 x BD Vacutainer 3.0 ml  
275 (pink), 1 x BD Vacutainer 2.7 ml (blue), and 1 x BD Seditainer 5.0 ml (black) for a total of  
276 42.7 ml blood from each patient (BD, USA)).

277 We will measure:

- 278 • routine laboratory parameters: bilirubin, urea, creatinine, cholesterol (total, high-  
279 density and low-density lipoproteins), triglyceride, aspartate, aspartate  
280 aminotransferase, alanine aminotransferase, alkaline phosphatase, gamma-glutamyl  
281 transferase, total protein, albumin, immunoglobulins, C-reactive protein, vitamin B<sub>12</sub>,  
282 homocysteine, blood counts, and erythrocyte sedimentation

- 1  
2  
3 283 • immunological indicators: antiphospholipid antibodies (lupus anticoagulant,  
4 284 cardiolipin IgG/A/M, B2-glycoprotein-I IgG/A/M, prothrombin IgG/A/M) and celiac-  
5 285 specific antibodies (tTG IgA/G, EMA IgA).  
6  
7  
8 286 • hemostatic parameters: prothrombin, thrombin time, activated partial thromboplastin  
9 287 time, fibrinogen, antithrombin activity, protein C activity, and protein S activity  
10  
11 288 • hemorheological parameters: erythrocyte aggregation by Myrenne aggregometer  
12 289 (model MA-1, Myrenne GmbH, Roetgen, Germany) and Laser-assisted Optical  
13 290 Rotational Cell Analyzer (LORCA, R&R Mechatronics, Hoorn, The Netherlands);  
14 291 erythrocyte deformability with laser-diffraction ektacytometry with a LORCA; and  
15 292 viscosity of whole blood and plasma by Brookfield DV-III Ultra LV Programmable  
16 293 rotational viscometer (Brookfield Engineering Labs; Middleboro, Mass., USA).

17  
18  
19  
20  
21 294 Strict adherence will be kept during the hemorheological tests to the guidelines proposed  
22 295 by the International Expert Panel for Standardization of Hemorheological Methods.[59] The  
23 296 fact that equipment for hemorheological measurements is not available in other centres in  
24 297 Hungary and that blood samples must be processed within two hours of sampling without  
25 298 freezing restricted our expansion of this project to a multicentre study.

26  
27  
28  
29 299 An extra tube will be collected and stored for further hemostatic measurements (e.g.,  
30 300 clotting factors) if any abnormality of parameters measured is detected.

31  
32 301 Midstream urine (at least 100 ml) will be collected in sterile urine sample containers.  
33 302 Samples will be stored at 4°C until transfer to the Biobank at the Institute for Translational  
34 303 Medicine, University of Pécs Medical School, on the day of sampling, where samples will be  
35 304 deep frozen at -80°C. After preparation, urine GIP detection will be performed with Biomedal  
36 305 (Spain) products.

37  
38  
39  
40 306

## 41 307 **Outcomes**

### 42 308 1. Primary

- 43  
44  
45 309 • Hemorheological test results (erythrocyte aggregation and deformability, whole  
46 310 blood and plasma viscosity).

### 47 311 2. Secondary

- 48  
49  
50 312 • Hemostatic test results (antithrombin, protein C, protein S).  
51 313

## 52 314 **Target number of patients**

53  
54  
55  
56  
57  
58  
59  
60

315 This is a two-phase study. In the first phase, we will enrol 50 CeD and 50 IBD patients  
 316 with 50 age- and sex-matched control subjects; the case-control ratio will be 1:1:1,  
 317 respectively. Then, an interim analysis will be performed to calculate the power for the  
 318 analyses of the outcomes. If the power exceeds 80%, recruitment will be considered  
 319 completed; otherwise, recruitment will continue until the desired power is reached.

320

### 321 **Patient and Public Involvement**

322 Before starting recruitment, randomly selected CeD and IBD patients reviewed the  
 323 questionnaires and the information sheet designed to share details of the study for participants  
 324 to facilitate better understanding.

325

### 326 **Blinding**

327 Blinding of personnel included in the study is presented in Table 4.

328

329 Table 4. Blinding of personnel included in the study

|                     | Physician<br>enrolling<br>patient | Physician<br>administering<br>questionnaires | Dietitian        | Laboratory<br>personnel |
|---------------------|-----------------------------------|----------------------------------------------|------------------|-------------------------|
| Disease activity    | N/A                               | Blinded                                      | Blinded          | Blinded                 |
| Questionnaires      | Blinded*                          | N/A                                          | Blinded          | Blinded                 |
| Dietary interview   | Blinded*                          | Blinded                                      | N/A <sup>#</sup> | Blinded                 |
| Laboratory measures | Blinded*                          | Blinded                                      | Blinded          | N/A                     |

330

331 N/A: not applicable.

332 \*The treating physician will immediately access data for safety reasons and act accordingly.

333 Patients will be informed of the laboratory results in a letter.

334 <sup>#</sup>Dietary education will be provided based on dietary adherence.

335

### 336 **Data management**

337 A subject identification number will be provided consecutively to every patient after  
 338 inclusion. Subject identification numbers with sensitive data on patients (including the name,  
 339 insurance number, and date of enrolment) will be stored in a locked file separately from other  
 340 data. De-identified data will be added to the source documentation stored in locked cabinets.  
 341 Source documentation will be entered in an electronic case report file (e-CRF). The Principal  
 342 Investigators will ensure that the data in an e-CRF are accurate, complete, and legible (range  
 343 checks for data values). E-CRFs will be stored on a secured server at the Institute for  
 344 Translational Medicine, University of Pécs Medical School. Access to data will be restricted  
 345 through a password system to personnel involved in data management. A three-level data

1  
2  
3 346 check will be continuously performed, and final data will be finally approved by the Principal  
4 347 Investigator to ensure data quality.

5  
6 348 To ensure precise data collection, administrative and medical staff members will be invited  
7 349 to participate in training sessions to familiarize them with the study requirements,  
8 350 standardized data recording, and biological specimen collection.

9  
10  
11 351 The de-identified dataset will be delivered for the purpose of sharing on request.  
12 352

### 13 14 353 **Statistical Analysis**

15 354 First, descriptive statistics will entail a graphical presentation of data. Continuous variables  
16 355 will be reported as a central tendency with a measure of dispersion, while categorical  
17 356 variables will be reported as absolute and relative frequencies. Then, data will be analyzed  
18 357 with Student's tests, methods of Variance Analysis, and regression models if data are  
19 358 normally distributed; otherwise, non-parametric tests will be introduced. Chi-square or  
20 359 Fisher's tests will be used to analyze categorical variables. Multivariate analysis will be used  
21 360 to explore the association between thrombotic risk factors and primary outcomes. A  
22 361 probability of less than .05 indicates a statistically significant difference between groups.

23  
24 362 Only patients with a full dataset in their hemorheological and hemostatic profile will be  
25 363 included in the analysis. The following comparisons will be done: CeD vs. control, tTG+ CeD  
26 364 vs. tTG- CeD, IBD vs. control, active IBD vs. remitting IBD.

27 365 An interim analysis is planned after recruiting the target number of the first phase to  
28 366 calculate power. Audits are not necessary due to the case-control design.  
29 367

### 30 31 368 **Biobank and accessory research**

32 369 After laboratory analysis, urine and blood (whole blood and plasma, at least 1 ml each)  
33 370 residues will be stored in the Institute for Translational Medicine Biobank at -80°C for future  
34 371 studies (for at least five years). Additional samples will not be taken for storage purposes.  
35 372 Containers will be labelled with the subject identification number, and samples will be  
36 373 completely de-identified.

37  
38 374 CeD patients will be offered an opportunity to participate in the "Monitoring the  
39 375 prevalence, symptoms, complications, and family history of celiac disease and the effect of a  
40 376 gluten-free diet – Celiac registry" research project (approved by the Scientific and Research  
41 377 Ethics Committee of the Medical Research Council, Ref No 45098-2/2016/EKU).  
42 378

### 43 44 379 **Protocol amendments and disseminating policy**



1  
2  
3 380 This protocol is the first version completed on 30 May 2018. If required, the online version  
4 381 will be updated in the ISRCTN registry. Major modifications should be permitted by the  
5  
6 382 Regional and Local Research Ethics Committee.

7 383 The trial status is ongoing; recruitment began on 1 May 2018. The expected date of  
8 384 completion is 31 May 2019.

9  
10  
11 385

## 12 386 **ETHICS AND DISSEMINATION**

13  
14 387 The study was approved by the Regional and Local Research Ethics Committee,  
15 388 University of Pécs (Ref No 6917). Publication in a high-impact peer-reviewed journal is  
16  
17 389 planned. We will adhere to authorship criteria for manuscripts submitted for publication set  
18  
19 390 by the International Committee of Medical Journal Editors.

20  
21 391

## 22 392 **REFERENCES**

- 23  
24 393 1. El-Gabalawy H, Guenther LC, Bernstein CN. Epidemiology of immune-mediated inflammatory  
25 394 diseases: incidence, prevalence, natural history, and comorbidities. *J Rheumatol Suppl* 2010;85:2-10.  
26 395 2. Pascual V, Dieli-Crimi R, Lopez-Palacios N, et al. Inflammatory bowel disease and celiac  
27 396 disease: overlaps and differences. *World J Gastroenterol* 2014;20:4846-56.  
28 397 3. Peery AF, Crockett SD, Barritt AS, et al. Burden of Gastrointestinal, Liver, and Pancreatic  
29 398 Diseases in the United States. *Gastroenterology* 2015;149:1731-41.e3.  
30 399 4. Singh P, Arora A, Strand TA, et al. Global Prevalence of Celiac Disease: Systematic Review and  
31 400 Meta-analysis. *Clin Gastroenterol Hepatol* 2018;16:823-36.e2.  
32 401 5. Husby S, Koletzko S, Korponay-Szabo IR, et al. European Society for Pediatric  
33 402 Gastroenterology, Hepatology, and Nutrition guidelines for the diagnosis of coeliac disease. *J Pediatr*  
34 403 *Gastroenterol Nutr* 2012;54:136-60.  
35 404 6. Molodecky NA, Soon IS, Rabi DM, et al. Increasing incidence and prevalence of the  
36 405 inflammatory bowel diseases with time, based on systematic review. *Gastroenterology* 2012;142:46-  
37 406 54.e42.  
38 407 7. Kaplan GG. The global burden of IBD: from 2015 to 2025. *Nat Rev Gastroenterol Hepatol*  
39 408 2015;12:720-7.  
40 409 8. Zhang YZ, Li YY. Inflammatory bowel disease: pathogenesis. *World J Gastroenterol*  
41 410 2014;20:91-9.  
42 411 9. Rogler G. Where are we heading to in pharmacological IBD therapy? *Pharmacol Res*  
43 412 2015;100:220-7.  
44 413 10. Tamaki H, Khasnis A. Venous thromboembolism in systemic autoimmune diseases: A  
45 414 narrative review with emphasis on primary systemic vasculitides. *Vasc Med* 2015;20:369-76.  
46 415 11. Jastrzebska M, Czok ME, Guzik P. Autoimmune diseases, their pharmacological treatment  
47 416 and the cardiovascular system. *Cardiol J* 2013;20:569-76.  
48 417 12. Ramagopalan SV, Wotton CJ, Handel AE, et al. Risk of venous thromboembolism in people  
49 418 admitted to hospital with selected immune-mediated diseases: record-linkage study. *BMC Med*  
50 419 2011;9:1.  
51 420 13. Yusuf HR, Hooper WC, Beckman MG, et al. Risk of venous thromboembolism among  
52 421 hospitalizations of adults with selected autoimmune diseases. *J Thromb Thrombolysis* 2014;38:306-  
53 422 13.  
54 423 14. Zoller B, Li X, Sundquist J, et al. Risk of pulmonary embolism in patients with autoimmune  
55 424 disorders: a nationwide follow-up study from Sweden. *Lancet* 2012;379:244-9.

- 1  
2  
3 425 15. Goldhaber SZ. Venous thromboembolism: epidemiology and magnitude of the problem. *Best*  
4 426 *Pract Res Clin Haematol* 2012;25:235-42.
- 5 427 16. Prandoni P, Pesavento R, Sorensen HT, et al. Prevalence of heart diseases in patients with  
6 428 pulmonary embolism with and without peripheral venous thrombosis: findings from a cross-sectional  
7 429 survey. *Eur J Intern Med* 2009;20:470-3.
- 8 430 17. Sorensen HT, Horvath-Puho E, Lash TL, et al. Heart disease may be a risk factor for pulmonary  
9 431 embolism without peripheral deep venous thrombosis. *Circulation* 2011;124:1435-41.
- 10 432 18. Sorensen HT, Horvath-Puho E, Pedersen L, et al. Venous thromboembolism and subsequent  
11 433 hospitalisation due to acute arterial cardiovascular events: a 20-year cohort study. *Lancet*  
12 434 2007;370:1773-9.
- 13 435 19. Chang HH, Chiang BL. The diagnosis and classification of autoimmune coagulopathy: an  
14 436 updated review. *Autoimmun Rev* 2014;13:587-90.
- 15 437 20. Lerner A, Blank M. Hypercoagulability in celiac disease--an update. *Autoimmun Rev*  
16 438 2014;13:1138-41.
- 17 439 21. Lerner A, Agmon-Levin N, Shapira Y, et al. The thrombophilic network of autoantibodies in  
18 440 celiac disease. *BMC Med* 2013;11:89.
- 19 441 22. Berthoux E, Fabien N, Chayvialle JA, et al. [Adult celiac disease with thrombosis: a case series  
20 442 of seven patients. Role of thrombophilic factors]. *Rev Med Interne* 2011;32:600-4.
- 21 443 23. Hallert C, Grant C, Grehn S, et al. Evidence of poor vitamin status in coeliac patients on a  
22 444 gluten-free diet for 10 years. *Aliment Pharmacol Ther* 2002;16:1333-9.
- 23 445 24. Shamir R, Shoenfeld Y, Blank M, et al. The prevalence of coeliac disease antibodies in patients  
24 446 with the antiphospholipid syndrome. *Lupus* 2003;12:394-9.
- 25 447 25. Verma AK, Gatti S, Galeazzi T, et al. Gluten Contamination in Naturally or Labeled Gluten-Free  
26 448 Products Marketed in Italy. *Nutrients* 2017;9.
- 27 449 26. Mitu O, Alexandrescu DM, Catalina M, et al. Is there a cardiovascular risk in inflammatory  
28 450 bowel diseases? *Rev Med Chir Soc Med Nat Iasi* 2014;118:918-23.
- 29 451 27. Kristensen SL, Ahlehoff O, Lindhardtsen J, et al. Disease activity in inflammatory bowel disease  
30 452 is associated with increased risk of myocardial infarction, stroke and cardiovascular death--a Danish  
31 453 nationwide cohort study. *PLoS One* 2013;8:e56944.
- 32 454 28. Danese S, Papa A, Saibeni S, et al. Inflammation and coagulation in inflammatory bowel  
33 455 disease: The clot thickens. *Am J Gastroenterol* 2007;102:174-86.
- 34 456 29. Magro F, Soares JB, Fernandes D. Venous thrombosis and prothrombotic factors in  
35 457 inflammatory bowel disease. *World J Gastroenterol* 2014;20:4857-72.
- 36 458 30. Park KH, Kim U, Choi KU, et al. Hemorheologic Alterations in Patients with Type 2 Diabetes  
37 459 Mellitus Presented with an Acute Myocardial Infarction. *Diabetes Metab J* 2018;42:155-63.
- 38 460 31. Vaya A, Rivera L, de la Espriella R, et al. Red blood cell distribution width and erythrocyte  
39 461 deformability in patients with acute myocardial infarction. *Clin Hemorheol Microcirc* 2015;59:107-14.
- 40 462 32. Zorio E, Murado J, Arizo D, et al. Haemorheological parameters in young patients with acute  
41 463 myocardial infarction. *Clin Hemorheol Microcirc* 2008;39:33-41.
- 42 464 33. Banerjee R, Nageswari K, Puniyani RR. Association of hemorheological parameters and risk of  
43 465 stroke in hypertensives of Indian origin. *Clin Exp Hypertens* 2000;22:687-94.
- 44 466 34. Aleman MM, Walton BL, Byrnes JR, et al. Fibrinogen and red blood cells in venous  
45 467 thrombosis. *Thromb Res* 2014;133 Suppl 1:S38-40.
- 46 468 35. Wolberg AS, Aleman MM, Leiderman K, et al. Procoagulant activity in hemostasis and  
47 469 thrombosis: Virchow's triad revisited. *Anesth Analg* 2012;114:275-85.
- 48 470 36. Ernst E, Hein A, Meurer M, et al. Blood rheology in lupus erythematosus. *Ann Rheum Dis*  
49 471 1991;50:710-2.
- 50 472 37. Shurkhina ES, Nesterenko VM, Lisovskaya IL, et al. Detection of stages of autoimmune  
51 473 hemolytic anemia by evaluating erythrocyte deformability and density. *Bull Exp Biol Med*  
52 474 2004;138:280-3.
- 53 475 38. Spengler MI, Svetaz MJ, Leroux MB, et al. Erythrocyte aggregation in patients with systemic  
54 476 lupus erythematosus. *Clin Hemorheol Microcirc* 2011;47:279-85.

- 1  
2  
3 477 39. Adams MJ, Palatinus AA, Harvey AM, et al. Impaired control of the tissue factor pathway of  
4 478 blood coagulation in systemic lupus erythematosus. *Lupus* 2011;20:1474-83.  
5 479 40. Costallat LT, Ribeiro CC, Annichino-Bizzacchi JM. Antithrombin, protein S and protein C and  
6 480 antiphospholipid antibodies in systemic lupus erythematosus. *Sangre (Barc)* 1998;43:345-8.  
7 481 41. Kordich LC, Forastiero RR, Basilotta E, et al. Natural inhibitors of blood coagulation and  
8 482 fibrinolysis in patients with lupus anticoagulant. *Blood Coagul Fibrinolysis* 1992;3:765-71.  
9 483 42. Akman T, Akarsu M, Akpınar H, et al. Erythrocyte deformability and oxidative stress in  
10 484 inflammatory bowel disease. *Dig Dis Sci* 2012;57:458-64.  
11 485 43. Novacek G, Vogelsang H, Genser D, et al. Changes in blood rheology caused by Crohn's  
12 486 disease. *Eur J Gastroenterol Hepatol* 1996;8:1089-93.  
13 487 44. Zilberman L, Rogowski O, Rozenblat M, et al. Inflammation-related erythrocyte aggregation  
14 488 in patients with inflammatory bowel disease. *Dig Dis Sci* 2005;50:677-83.  
15 489 45. Lobo AJ, Jones SC, Jubly LD, et al. Plasma viscosity in inflammatory bowel disease. *J Clin Pathol*  
16 490 1992;45:54-7.  
17 491 46. Cakal B, Gokmen A, Yalinkilic M, et al. Natural anticoagulant protein levels in Turkish patients  
18 492 with inflammatory bowel disease. *Blood Coagul Fibrinolysis* 2010;21:118-21.  
19 493 47. Heneghan MA, Cleary B, Murray M, et al. Activated protein C resistance, thrombophilia, and  
20 494 inflammatory bowel disease. *Dig Dis Sci* 1998;43:1356-61.  
21 495 48. Kohoutova D, Pecka M, Cihak M, et al. Prevalence of hypercoagulable disorders in  
22 496 inflammatory bowel disease. *Scand J Gastroenterol* 2014;49:287-94.  
23 497 49. Yurekli BP, Aksoy DY, Aybar M, et al. The search for a common thrombophilic state during the  
24 498 active state of inflammatory bowel disease. *J Clin Gastroenterol* 2006;40:809-13.  
25 499 50. Chan AW, Tetzlaff JM, Altman DG, et al. SPIRIT 2013 statement: defining standard protocol  
26 500 items for clinical trials. *Ann Intern Med* 2013;158:200-7.  
27 501 51. Marta K, Szabo AN, Peci D, et al. High versus low energy administration in the early phase of  
28 502 acute pancreatitis (GOULASH trial): protocol of a multicentre randomised double-blind clinical trial.  
29 503 *BMJ Open* 2017;7:e015874.  
30 504 52. Rubio-Tapia A, Hill ID, Kelly CP, et al. ACG clinical guidelines: diagnosis and management of  
31 505 celiac disease. *Am J Gastroenterol* 2013;108:656-76.  
32 506 53. Dignass A, Eliakim R, Magro F, et al. Second European evidence-based consensus on the  
33 507 diagnosis and management of ulcerative colitis part 1: definitions and diagnosis. *J Crohns Colitis*  
34 508 2012;6:965-90.  
35 509 54. Dignass A, Van Assche G, Lindsay JO, et al. The second European evidence-based Consensus  
36 510 on the diagnosis and management of Crohn's disease: Current management. *J Crohns Colitis*  
37 511 2010;4:28-62.  
38 512 55. Svedlund J, Sjodin I, Dotevall G. GSRS--a clinical rating scale for gastrointestinal symptoms in  
39 513 patients with irritable bowel syndrome and peptic ulcer disease. *Dig Dis Sci* 1988;33:129-34.  
40 514 56. Schroeder KW, Tremaine WJ, Ilstrup DM. Coated oral 5-aminosalicylic acid therapy for mildly  
41 515 to moderately active ulcerative colitis. A randomized study. *N Engl J Med* 1987;317:1625-9.  
42 516 57. Modigliani R, Mary JY, Simon JF, et al. Clinical, biological, and endoscopic picture of attacks of  
43 517 Crohn's disease. Evolution on prednisolone. Groupe d'Etude Therapeutique des Affections  
44 518 Inflammatoires Digestives. *Gastroenterology* 1990;98:811-8.  
45 519 58. Silvester JA, Weiten D, Graff LA, et al. Living gluten-free: adherence, knowledge, lifestyle  
46 520 adaptations and feelings towards a gluten-free diet. *J Hum Nutr Diet* 2016;29:374-82.  
47 521 59. Baskurt OK, Boynard M, Cokelet GC, et al. New guidelines for hemorheological laboratory  
48 522 techniques. *Clin Hemorheol Microcirc* 2009;42:75-97.  
49  
50  
51  
52 523

## 53 524 **AUTHORS' CONTRIBUTIONS**

1  
2  
3 525 JB is the Principal Investigator. ZS is the Trial Coordinator. ZS, PH, JB, ÁV, and KT  
4 526 conceptualized the study, drafted, and revised this manuscript. NF and EB planned and  
5 527 drafted the statistical analysis. PS, JB, and ÁV provided us with special expertise in the  
6 528 management of celiac disease and inflammatory bowel patients. BC and PK are performing  
7 529 the hemorheological measurements and interpreting the results. AH, ÁN, TB, and MTF  
8 530 provided us with special expertise in hemostatic and immunological measurements. BK is  
9 531 contributing significantly to the biochemical analyses. IV planned and is carrying out the  
10 532 dietary assessment of the celiac patients. KM, AS, ZS, and PH are responsible for data  
11 533 management, administrative coordination, and biological sampling; they drafted and revised  
12 534 the manuscript. All the authors have read and approved the final manuscript.  
13  
14  
15  
16  
17  
18  
19

535

### 536 **FUNDING STATEMENT**

537 The project is non-industry-funded. Study and centre costs are covered by the University of  
538 Pécs Medical School, by a Momentum Grant from the Hungarian Academy of Sciences  
539 (LP2014-10/2014), by a Highly Cited Publication Grant (KH 125678) from the National  
540 Research Development and Innovation Office, by GINOP 2.3.2-15-2016-00048 Stay Alive  
541 and EFOP-3.6.2-16-2017-0006, and by the Translational Medicine Foundation. In addition,  
542 this project is supported by the ÚNKP-17-3-II New National Excellence Programme, Ministry  
543 of Human Capacities.

544 Funders have no influence on preparations, course, interpretation, or publication of results.

545

### 546 **COMPETING INTEREST STATEMENT**

547 Nothing to declare.

# BMJ Open

## Hemorheological and hemostatic alterations in celiac disease and inflammatory bowel disease in comparison with non-celiac, non-IBD subjects (HERMES): A case-control study protocol

|                               |                                                                                                                                                                                                                                                                                                                                                                                                                                                                                                                                                                                                                                                                                                                                                                                                                                                                                                                                                                                                                                                                                                                                                                                                                                                                                                                                                                                                                                                                                                                                                                                                                                                                                                                                                                                                                                                                                                                                                                                                                                                                                                                                                                                                                                                                                                                                            |
|-------------------------------|--------------------------------------------------------------------------------------------------------------------------------------------------------------------------------------------------------------------------------------------------------------------------------------------------------------------------------------------------------------------------------------------------------------------------------------------------------------------------------------------------------------------------------------------------------------------------------------------------------------------------------------------------------------------------------------------------------------------------------------------------------------------------------------------------------------------------------------------------------------------------------------------------------------------------------------------------------------------------------------------------------------------------------------------------------------------------------------------------------------------------------------------------------------------------------------------------------------------------------------------------------------------------------------------------------------------------------------------------------------------------------------------------------------------------------------------------------------------------------------------------------------------------------------------------------------------------------------------------------------------------------------------------------------------------------------------------------------------------------------------------------------------------------------------------------------------------------------------------------------------------------------------------------------------------------------------------------------------------------------------------------------------------------------------------------------------------------------------------------------------------------------------------------------------------------------------------------------------------------------------------------------------------------------------------------------------------------------------|
| Journal:                      | <i>BMJ Open</i>                                                                                                                                                                                                                                                                                                                                                                                                                                                                                                                                                                                                                                                                                                                                                                                                                                                                                                                                                                                                                                                                                                                                                                                                                                                                                                                                                                                                                                                                                                                                                                                                                                                                                                                                                                                                                                                                                                                                                                                                                                                                                                                                                                                                                                                                                                                            |
| Manuscript ID                 | bmjopen-2018-026315.R1                                                                                                                                                                                                                                                                                                                                                                                                                                                                                                                                                                                                                                                                                                                                                                                                                                                                                                                                                                                                                                                                                                                                                                                                                                                                                                                                                                                                                                                                                                                                                                                                                                                                                                                                                                                                                                                                                                                                                                                                                                                                                                                                                                                                                                                                                                                     |
| Article Type:                 | Protocol                                                                                                                                                                                                                                                                                                                                                                                                                                                                                                                                                                                                                                                                                                                                                                                                                                                                                                                                                                                                                                                                                                                                                                                                                                                                                                                                                                                                                                                                                                                                                                                                                                                                                                                                                                                                                                                                                                                                                                                                                                                                                                                                                                                                                                                                                                                                   |
| Date Submitted by the Author: | 18-Dec-2018                                                                                                                                                                                                                                                                                                                                                                                                                                                                                                                                                                                                                                                                                                                                                                                                                                                                                                                                                                                                                                                                                                                                                                                                                                                                                                                                                                                                                                                                                                                                                                                                                                                                                                                                                                                                                                                                                                                                                                                                                                                                                                                                                                                                                                                                                                                                |
| Complete List of Authors:     | <p>Szakács, Zsolt; Institute for Translational Medicine, University of Pécs Medical School; János Szentágothai Research Center, University of Pécs</p> <p>Csiszár, Beáta; Division of Cardiology and Angiology, First Department of Medicine, University of Pécs Medical School; János Szentágothai Research Center, University of Pécs</p> <p>Kenyeres, Péter; Division of Cardiology and Angiology, First Department of Medicine, University of Pécs Medical School; János Szentágothai Research Center, University of Pécs</p> <p>Sarlós, Patrícia; Division of Gastroenterology, First Department of Medicine, University of Pécs Medical School; János Szentágothai Research Center, University of Pécs</p> <p>Erőss, Bálint; Institute for Translational Medicine, University of Pécs Medical School; Division of Gastroenterology, First Department of Medicine, University of Pécs Medical School</p> <p>Hussain, Alizadeh; Division of Hematology, First Department of Medicine, University of Pécs Medical School; János Szentágothai Research Center, University of Pécs</p> <p>Nagy, Ágnes; Division of Hematology, First Department of Medicine, University of Pécs Medical School</p> <p>Kőszegi, Balázs; Department of Biochemistry and Medical Chemistry, University of Pécs Medical School</p> <p>Veczák, Ibolya; Division of Gastroenterology, First Department of Medicine, University of Pécs Medical School</p> <p>Farkas, Nelli; Institute of Bioanalysis, University of Pécs Medical School</p> <p>Bódis, Emőke; Institute for Translational Medicine, University of Pécs Medical School</p> <p>Márta, Katalin; Institute for Translational Medicine, University of Pécs Medical School; János Szentágothai Research Center, University of Pécs</p> <p>Szentesi, Andrea; Institute for Translational Medicine, University of Pécs Medical School</p> <p>Tőkés-Füzesi, Margit; Department of Laboratory Medicine, University of Pécs Medical School</p> <p>Berki, Tímea; Department of Immunology and Biotechnology, University of Pécs Medical School</p> <p>Vincze, Áron; Division of Gastroenterology, First Department of Medicine, University of Pécs Medical School; János Szentágothai Research Center, University of Pécs</p> <p>Toth, Kalman; Division of Cardiology and Angiology, First Department of</p> |

|                                    |                                                                                                                                                                                                                                                                                                                                                                     |
|------------------------------------|---------------------------------------------------------------------------------------------------------------------------------------------------------------------------------------------------------------------------------------------------------------------------------------------------------------------------------------------------------------------|
|                                    | Medicine, University of Pécs Medical School; János Szentágothai Research Center, University of Pécs<br>Hegyí, Péter; Institute for Translational Medicine, University of Pécs Medical School; János Szentágothai Research Center, University of Pécs<br>Bajor, Judit; Division of Gastroenterology, First Department of Medicine, University of Pécs Medical School |
| <b>Primary Subject Heading</b> :   | Gastroenterology and hepatology                                                                                                                                                                                                                                                                                                                                     |
| <b>Secondary Subject Heading</b> : | Immunology (including allergy), Haematology (incl blood transfusion)                                                                                                                                                                                                                                                                                                |
| <b>Keywords</b> :                  | Inflammatory bowel disease < GASTROENTEROLOGY, Coeliac disease < GASTROENTEROLOGY, thrombosis, hemorheology                                                                                                                                                                                                                                                         |
|                                    |                                                                                                                                                                                                                                                                                                                                                                     |

SCHOLARONE™  
Manuscripts

1 Hemorheological and hemostatic alterations in celiac disease and inflammatory bowel disease  
2 in comparison with non-celiac, non-IBD subjects (HERMES): A case-control study protocol

3  
4 Zsolt Szakács<sup>1,2</sup>, Beáta Csiszár<sup>2,3</sup>, Péter Kenyeres<sup>2,3</sup>, Patrícia Sarlós<sup>2,4</sup>, Bálint Eröss<sup>1,4</sup>, Alizadeh  
5 Hussain<sup>2,5</sup>, Ágnes Nagy<sup>5</sup>, Balázs Kőszegi<sup>6</sup>, Ibolya Veczák<sup>4</sup>, Nelli Farkas<sup>7</sup>, Emőke Bódis<sup>2</sup>,  
6 Katalin Márta<sup>1,2</sup>, Andrea Szentesi<sup>1</sup>, Margit Tőkés-Füzesi<sup>8</sup>, Tímea Berki<sup>9</sup>, Áron Vincze<sup>2,4</sup>,  
7 Kálmán Tóth<sup>2,3</sup>, Péter Hegyi<sup>1,2^</sup>, Judit Bajor<sup>4^</sup>

8  
9 <sup>1</sup>Institute for Translational Medicine, University of Pécs Medical School, Pécs, Hungary

10 <sup>2</sup>János Szentágotthai Research Center, University of Pécs, Pécs, Hungary

11 <sup>3</sup>Division of Cardiology and Angiology, First Department of Medicine, University of Pécs  
12 Medical School, Pécs, Hungary

13 <sup>4</sup>Division of Gastroenterology, First Department of Medicine, University of Pécs Medical  
14 School, Pécs, Hungary

15 <sup>5</sup>Division of Hematology, First Department of Medicine, University of Pécs Medical School,  
16 Pécs, Hungary

17 <sup>6</sup>Department of Biochemistry and Medical Chemistry, University of Pécs Medical School, Pécs,  
18 Hungary

19 <sup>7</sup>Institute of Bioanalysis, University of Pécs Medical School, Pécs, Hungary

20 <sup>8</sup>Department of Laboratory Medicine, University of Pécs Medical School, Pécs, Hungary

21 <sup>9</sup>Department of Immunology and Biotechnology, University of Pécs Medical School, Pécs,  
22 Hungary

23  
24 ^equal contributors

## 25 26 **Correspondence**

27 Name: Péter Hegyi, MD

28 Postal address: H-7624 Pécs, Szigeti út 12., Hungary

29 Email: [p.hegyi@tm-centre.org](mailto:p.hegyi@tm-centre.org)

30 Tel: +(36-72) 536-246

31  
32 **Word count (abstract):** 299/300

33 **Word count (text):** 3002

## 35 **Abstract**

## 37 **Introduction**

38 Hemorheological and hemostatic changes predispose to the development of arterial and  
39 venous thrombotic events; however, limited information is available on the status of these  
40 changes in celiac disease (CeD) and inflammatory bowel disease (IBD). In this study, we aim  
41 to describe the hemorheological and hemostatic profiles of CeD and IBD patients in a  
42 Hungarian cohort of patients to investigate whether any alterations contribute to elevated  
43 thrombotic risk.

## 44 **Methods and analysis**

45 This is a case-control study involving newly diagnosed and followed CeD and IBD patients  
46 with age- and sex-matched non-CeD, non-IBD subjects with an allocation ratio of 1:1:1.

47 After informed consent is obtained, a detailed medical history will be collected, including  
48 venous and arterial thrombotic risk factors and medications. Symptoms in CeD patients will be  
49 assessed with the Gastrointestinal Symptoms Rating Scale, and disease activity in IBD patients  
50 will be determined by disease-specific scores. Dietary adherence will be assessed among CeD  
51 patients with a thorough interview together with a measurement of self-reported adherence,  
52 dietary knowledge, and urine analysis (detection of gluten immunogenic peptides). In addition  
53 to routine laboratory parameters, hemorheological (i.e., erythrocyte deformability and  
54 aggregation, viscosity of whole blood and plasma) and hemostatic parameters (e.g., protein C,  
55 protein S, and antithrombin) with immunological indicators (i.e., celiac-specific serology and  
56 antiphospholipid antibodies) will be measured from venous blood for every participant.

57 Primary and secondary outcomes will be hemorheological and hemostatic parameters,  
58 respectively. Univariate and multivariate statistics will be used to compare CeD and IBD  
59 patients to control subjects. Subgroup analysis will be performed by disease type in IBD,  
60 (Crohn's disease and ulcerose colitis), dietary adherence in CeD, and disease activity in IBD  
61 and CeD.

## 62 **Ethics and dissemination**

63 The study was approved by the Regional and Local Research Ethics Committee, University  
64 of Pécs (Ref No 6917). Findings will be disseminated at research conferences and in peer-  
65 reviewed journals.

## 66 **Trial registration**

67 ISRCTN49677481.

68



69 **Key words:** celiac disease, inflammatory bowel disease, hemorheology, thrombosis

71 **Strengths and limitations of this study**

- 72 • Immune-mediated bowel diseases are associated with an increased risk of arterial and  
73 venous thrombosis, but specific hemorheological and hemostatic alterations are  
74 understudied in celiac disease and incomplete in inflammatory bowel disease.
- 75 • This case-control study prospectively recruits newly diagnosed and followed-up cases  
76 of celiac disease and inflammatory bowel disease with age- and sex-matched controls  
77 (the allocation ratio will be 1:1:1, respectively) to investigate clinical and laboratory  
78 alterations predisposing to thrombosis.
- 79 • Laboratory tests include the measurement of hemorheological (i.e., erythrocyte  
80 aggregation and deformability, plasma and whole blood viscosity), hemostatic  
81 parameters (e.g., levels of fibrinogen, prothrombin time, protein C, protein S, and  
82 antithrombin), and immunological indicators (e.g., celiac-specific serology and  
83 antiphospholipid antibodies).
- 84 • Patients will be divided by disease activity into active and inactive.
- 85 • Results should be interpreted with caution due to the single-centre nature and case-  
86 control design of the study.

88 **INTRODUCTION**

89 Immune-mediated disorders may affect 5–7% of the population.[1] These disorders  
90 frequently share pathways in pathogenesis as well as organ manifestations. Celiac disease  
91 (CeD) and inflammatory bowel disease (IBD) are systemic disorders, primarily affecting the  
92 intestines.[2] They impose a significant burden of complications and concomitant diseases on  
93 patients during the disease course.

94 CeD is a chronic, immune-mediated disorder, which develops upon gluten ingestion in  
95 genetically susceptible individuals.[3] Global prevalence of CeD is around 1% with  
96 geographical differences ranging from 0.14% up to 5.7%.[3] The clinical presentation can be  
97 divided into classic, non-classic, and asymptomatic forms.[4] Diagnosing asymptomatic and  
98 atypical cases is challenging but important, because the disease course of these cases may be  
99 alike.[5]

100 IBD – clinically classified as Crohn’s disease or ulcerative colitis – is a chronic, relapsing  
101 disorder, which develops as a result of the interaction between environmental and genetic

1  
2  
3 102 factors, leading to immunological responses and inflammation in the gastrointestinal tract.[6]  
4  
5 103 IBD is a less frequent entity than CeD: the increasing prevalence of ulcerative colitis and  
6  
7 104 Crohn's disease may reach 0.5% and 0.3% in Europe, respectively.[7, 8]

8  
9 105 Immune-mediated disorders may be associated with hemorheological[9-11] and hemostatic  
10  
11 106 changes[12-14], thereby contributing to an increased risk of thrombotic events.[15] This  
12  
13 107 increased risk is manifested in CeD[16] and IBD.[17] Mechanisms of thrombophilia in  
14  
15 108 immune-mediated disorders are complex, and acquired factors seem important.[18] An altered  
16  
17 109 hemorheological profile as well as the altered levels or function of pro- and anticoagulant  
18  
19 110 proteins, altered activity of clotting factors contribute to the development of arterial and venous  
20  
21 111 thrombotic events.[19-23]

22  
23 112 Clinical presentation of CeD-associated hypercoagulability includes a wide variety of  
24  
25 113 thrombosis at venous sites, pulmonary embolism, atheroembolism (stroke), and obstetric  
26  
27 114 complications.[24, 25] A single retrospective publication examined hemostatic alterations in a  
28  
29 115 small cohort of patients: sporadic cases of protein C and protein S deficiency (due to vitamin K  
30  
31 116 malabsorption), hyperhomocysteinemia, and antiphospholipid antibodies were identified.[26]  
32  
33 117 No studies have assessed the hemorheological changes in CeD. The multifactorial etiology of  
34  
35 118 thrombosis may embrace the interplay of malabsorption (vitamin and mineral deficiencies, e.g.,  
36  
37 119 vitamin B<sub>12</sub> and K deficiency), thrombophilic autoantibodies (anti-tissue transglutaminase  
38  
39 120 (tTG) and antiphospholipid antibodies), hyperhomocysteinemia, endothelial dysfunction,  
40  
41 121 accelerated atherosclerosis, thrombocytosis and thrombocyte dysfunction, hyperviscosity, and  
42  
43 122 genetics.[24, 26-31] Immune-mediated comorbidities ('autoimmune traits'), such as  
44  
45 123 antiphospholipid syndrome, may contribute to the elevated thrombotic risk as well.[29] In  
46  
47 124 addition, ingestion of trace amounts of gluten may maintain a continuous pro-inflammatory  
48  
49 125 response.[32]

50  
51 126 IBD is associated with venous thrombosis and pulmonary embolism as well as with the  
52  
53 127 cardiovascular consequences of atherosclerosis, i.e., stroke and myocardial infarction.[33, 34]  
54  
55 128 A significant decline in anticoagulant mechanism is well-established and there are sporadic  
56  
57 129 reports on activity-dependent prothrombotic hemorheological changes.[35-38] However, while  
58  
59 130 individual studies have focused on single outcomes of laboratory parameters, none of them have  
60  
61 131 assessed the complete hemorheological profile of patients.[39-42] Other risk factors include  
62  
63 132 immobilization, surgical interventions, glucocorticoid therapy, vitamin deficiencies,  
64  
65 133 hyperhomocysteinemia, and chronic inflammation alone or in conjunction with the factors  
66  
67 134 above.[43, 44] In the case of IBD, disease activity may be a crucial determinant of thrombotic  
68  
69 135 risk.[34]

136

## 137 **Scope and objectives**

138 No studies have assessed hemorheological and hemostatic parameters within a study to  
 139 provide an overall view of thrombotic risk. Since our knowledge of hemorheological and  
 140 hemostatic changes is limited in CeD and IBD, this study aims to carry out a comprehensive  
 141 evaluation of venous and arterial prothrombotic alterations in these pro-inflammatory diseases  
 142 in a Hungarian cohort of patients.

### 143 1. Primary objective

- 144 • to identify a link between prothrombotic hemorheological and hemostatic alterations  
 145 and two common immune-mediated diseases (CeD and IBD)

### 146 2. Secondary objective

- 147 • to investigate the effect of disease activity on the hemorheological and hemostatic  
 148 profiles of CeD and IBD patients
- 149 • to find an association between the dietary adherence of CeD patients and the  
 150 hemorheological and hemostatic alterations
- 151 • to assess the modifying effect of immunosuppressant drugs in IBD on the  
 152 hemorheological and hemostatic profiles

## 153 **METHODS AND ANALYSIS**

### 155 **Design**

156 This is a case-control study with prospective recruitment of CeD and IBD patients with non-  
 157 CeD, non-IBD control subjects. The study does not change the routine management of subjects  
 158 included (for the World Health Organization checklist, see Table 1). The study protocol was  
 159 planned in accordance with the SPIRIT 2013 Statement.[45]

161 Table 1. World Health Organization checklist

| 48 <b>Data category</b>                                | 49 <b>Information</b>                                                                                                                                                                                                                                                                                                             |
|--------------------------------------------------------|-----------------------------------------------------------------------------------------------------------------------------------------------------------------------------------------------------------------------------------------------------------------------------------------------------------------------------------|
| 50 Primary registry and trial<br>51 identifying number | ISRCTN49677481                                                                                                                                                                                                                                                                                                                    |
| 52 Date of registration in primary<br>53 registry      | 05/03/2018                                                                                                                                                                                                                                                                                                                        |
| 54 Secondary identifying numbers                       | None                                                                                                                                                                                                                                                                                                                              |
| 55 Source(s) of monetary or material<br>56 support     | 57 University of Pécs Medical School; Momentum Grant from the<br>58 Hungarian Academy of Sciences (LP2014-10/2014); Highly Cited<br>59 Publication Grant (KH 125678) from the National Research<br>60 Development and Innovation Office; GINOP 2.3.2-15-2016-00048<br>Stay Alive, EFOP 3.6.2-16-2017-00006 Live Longer, and EFOP- |

|                                           |                                                                                                                                                                                                                                                                                                                                                                                                                                                                                                                                                                                  |
|-------------------------------------------|----------------------------------------------------------------------------------------------------------------------------------------------------------------------------------------------------------------------------------------------------------------------------------------------------------------------------------------------------------------------------------------------------------------------------------------------------------------------------------------------------------------------------------------------------------------------------------|
|                                           | 3.6.3-VEKOP-16-2017-00009; Translational Medicine Foundation; and New National Excellence Programme, Ministry of Human Capacities (ÚNKP-17-3-II, ÚNKP-18-3-I).                                                                                                                                                                                                                                                                                                                                                                                                                   |
| Primary sponsor                           | None                                                                                                                                                                                                                                                                                                                                                                                                                                                                                                                                                                             |
| Secondary sponsor(s)                      | None                                                                                                                                                                                                                                                                                                                                                                                                                                                                                                                                                                             |
| Contact for public queries                | Zsolt Szakács, MD, szakacs.zsolt@pte.hu                                                                                                                                                                                                                                                                                                                                                                                                                                                                                                                                          |
| Contact for scientific queries            | Judit Bajor, MD, bajor.judit@pte.hu                                                                                                                                                                                                                                                                                                                                                                                                                                                                                                                                              |
| Public title                              | Investigation of hemorheological and hemostatic alterations in celiac disease and inflammatory bowel disease in comparison with healthy subjects: A case-control study (HERMES)                                                                                                                                                                                                                                                                                                                                                                                                  |
| Scientific title                          | Hemorheological and hemostatic alterations in celiac disease and inflammatory bowel disease in comparison with non-celiac, non-IBD subjects: A case-control study (HERMES)                                                                                                                                                                                                                                                                                                                                                                                                       |
| Countries of recruitment                  | Hungary                                                                                                                                                                                                                                                                                                                                                                                                                                                                                                                                                                          |
| Health condition(s) or problem(s) studied | Celiac disease and inflammatory bowel disease                                                                                                                                                                                                                                                                                                                                                                                                                                                                                                                                    |
| Intervention(s)                           | Questionnaires (thrombophilia, dietary adherence, disease activity), urine collection (dietary adherence - urine-gluten immunogenic peptide detection), blood collection (hemorheological, hemostatic, and immunological tests complemented with routine laboratory panel)                                                                                                                                                                                                                                                                                                       |
| Key inclusion and exclusion criteria      | Inclusion criteria: adult patients ( $\geq 18$ years of age) suffering from biopsy-confirmed newly diagnosed or treated celiac disease (by ESPHGAN, ACG, WGO guidelines), or from inflammatory bowel disease (by ECCO guidelines), and non-celiac, non-IBD subjects<br>Exclusion criteria: chronic diseases (chronic kidney diseases, liver cirrhosis, heart failure, active malignant diseases), acute diseases within 2 weeks of inclusion, pregnancy, thrombotic events within 1 year, systematic lupus erythematosus, and use of oral anticoagulants or antiplatelet therapy |
| Study type                                | Observational                                                                                                                                                                                                                                                                                                                                                                                                                                                                                                                                                                    |
| Date of first enrolment                   | 30/5/2018                                                                                                                                                                                                                                                                                                                                                                                                                                                                                                                                                                        |
| Target sample size                        | First phase: 50 celiac and 50 IBD patients plus control (1–3 for each patient). Second phase: target number is determined by power calculation.                                                                                                                                                                                                                                                                                                                                                                                                                                  |
| Recruitment status                        | Ongoing                                                                                                                                                                                                                                                                                                                                                                                                                                                                                                                                                                          |
| Primary outcome(s)                        | Hemorheological test results                                                                                                                                                                                                                                                                                                                                                                                                                                                                                                                                                     |
| Key secondary outcomes                    | Hemostatic test results                                                                                                                                                                                                                                                                                                                                                                                                                                                                                                                                                          |

162

### 163 Trial organization and steering committee

164 The Centre for Translational Medicine at the University of Pécs, which was established to  
 165 advance medical research in gastroenterology, is the coordinator and designer of the HERMES  
 166 study. The centre is experienced in running investigator-initiated clinical trials.[46] A steering  
 167 committee will be set up to supervise the entire study process. The Principal Investigator (JB)  
 168 and the Trial Coordinator (ZS) are responsible for organizing patient recruitment, data

1  
2  
3 169 collection, sample collection, shipping, and storage, biochemical analysis, and the publication  
4 of study results.  
5 170  
6  
7 171

## 8 172 **Population and eligibility**

9  
10 173 We will include CeD patients, IBD patients, and non-CeD, non-IBD control subjects.  
11 Eligibility criteria will be as follows:  
12 174

### 13 175 a. Inclusion criteria (applies to all subjects)

- 14 176 ➤ Blood collection must be indicated with medical conditions
- 15 177 ➤ Signed informed consent

### 16 178 b. Inclusion criteria (applies to specific cohorts of patients)

- 17 179 ➤ CeD patients: biopsy-confirmed newly diagnosed or followed patients (with or  
18 without adhering to a gluten-free diet) aged  $\geq 18$  years; the establishment of a  
19 diagnosis should meet the current guidelines (ESPHGAN, ACG).[3, 47, 48]
- 20 182 ➤ IBD patients: newly diagnosed or followed-up patients (with active or remitting  
21 disease) aged  $\geq 18$  years (not following a gluten-free diet); the establishment of a  
22 diagnosis should meet the current guidelines (ECCO).[49, 50]
- 23 185 ➤ Non-CeD, non-IBD control subjects: individuals aged  $\geq 18$  years (not following a  
24 gluten-free diet) in whom CeD and IBD can be excluded according to the recent  
25 guidelines. [3, 47-50]

### 26 188 c. Exclusion criteria (applies to all subjects)

- 27 189 ➤ Chronic conditions:
  - 28 190 ➤ Estimated glomerular filtration rate calculated with CKD-EPI formula is
  - 29 191  $< 60 \text{ ml/min/1.73m}^2$  (CKD3 or more severe kidney failure)
  - 30 192 ➤ Liver cirrhosis in Child–Pugh B–C
  - 31 193 ➤ Heart failure (NYHA III–IV)
  - 32 194 ➤ Active malignant diseases
- 33 195 ➤ Any acute diseases or invasive procedures within two weeks of recruitment (e.g.,  
34 systemic infection, surgery, or major trauma)
- 35 197 ➤ Thrombotic events within 1 year of recruitment
- 36 198 ➤ Ongoing oral anticoagulant therapy (vitamin K antagonists) and/or antiplatelet  
37 drugs
- 38 200 ➤ Confirmed systemic lupus erythematosus
- 39 201 ➤ Pregnancy
- 40 202 ➤ Patients unable to understand the essentials of the informed consent

### 203 Flow and timing

204 All subjects at our academic hospital for a planned check-up or referred to the center for  
 205 diagnostic purposes will be recruited consecutively. The place of recruitment will be the  
 206 Division of Gastroenterology, First Department of Medicine, University of Pécs Medical  
 207 School. This tertiary centre provides professional gastroenterological care for about 300,000  
 208 inhabitants in Baranya County, Hungary.

209 Recruitment of the study population will be managed in two phases (see ‘Target number of  
 210 patient’ section), with the expected recruiting period being between May 2018 and May 2019  
 211 (covering one year). Table 2 shows the timeline of the study. Patients will be provided with an  
 212 information sheet and must provide written consent before sampling. Informed consent will be  
 213 obtained by personnel with a medical degree. Participants may withdraw from the study for any  
 214 reason at any time. Consent forms and other related documents will be accessible at [https://tm-](https://tm-centre.org)  
 215 [centre.org](https://tm-centre.org).

217 Table 2. Schedule for the study

| TIME POINT                          | Study period |            |                 |           |         |
|-------------------------------------|--------------|------------|-----------------|-----------|---------|
|                                     | Enrolment    | Allocation | Post-allocation |           |         |
|                                     | -1 hour      | 0          | +1 hour         | +1.5 hour | +2 hour |
| <b>ENROLMENT:</b>                   |              |            |                 |           |         |
| Eligibility screen                  | x            |            |                 |           |         |
| Informed consent                    | x            |            |                 |           |         |
| Allocation                          |              | x          |                 |           |         |
| <b>INTERVENTION:</b>                |              |            |                 |           |         |
| Interview and questionnaire         |              |            | x               |           |         |
| Urine collection                    |              |            |                 | x         |         |
| Blood collection                    |              |            |                 | x         |         |
| <b>ASSESSMENT</b>                   |              |            |                 |           |         |
| Symptom scores and disease activity |              |            | x               |           |         |
| Thrombophilia questionnaire         |              |            | x               |           |         |
| Dietary adherence                   |              |            | x               |           |         |
| Blood analysis <sup>#</sup>         |              |            |                 |           | x       |
| Urine analysis <sup>#</sup>         |              |            |                 |           | =>*     |

218

219 \* samples will be deep frozen until all participants have been recruited

220 <sup>#</sup>after analysis, blood and urine residues will be stored in the biobank

221

222 Patients will be monitored by our professional data management team throughout the entire  
 223 process of data and biological sample collection to ensure perfect adherence to protocol. Written  
 224 feedback will be provided to patients on the results of the laboratory tests and dietary evaluation.  
 225 If findings indicate, patients will be referred to their general practitioners or a specialist for  
 226 further investigation and management.

227

## 228 **Measurements**

229 All samples will be collected and questionnaires will be administered within two hours after  
 230 allocation. Actions for each group are defined and listed in Table 3.

231

232 Table 3. Actions within study

|                                           | CeD patients | IBD patients | Control subjects |
|-------------------------------------------|--------------|--------------|------------------|
| Thrombophilia questionnaire               | +            | +            | +                |
| GSRs                                      | +            | -            | +                |
| Dietary interview and GFD adherence tests | +            | -            | +                |
| Mayo Score/CDAI                           | -            | +            | +                |
| Urine GIP detection                       | +            | -            | +                |
| Laboratory measures                       |              |              |                  |
| routine parameters                        | +            | +            | +                |
| hemorheology                              | +            | +            | +                |
| hemostasis                                | +            | +            | +                |
| immunological indicators                  | +            | +            | +                |

233

234 CeD: celiac disease; CDAI: Crohn's Disease Activity Index; GFD: gluten-free diet; GIP:  
 235 gluten-immunogenic peptides; GSRs: Gastrointestinal Symptoms Rating Scale; IBD:  
 236 inflammatory bowel disease

237

238 Detailed history (including medications for preceding three months) and risk factors of  
 239 venous and arterial thrombotic events will be covered with a 15-minute thrombophilia  
 240 questionnaire (administered by a person with a medical degree).

241 The Gastrointestinal Symptoms Rating Scale is a tool designed to assess the severity of  
 242 gastrointestinal symptoms on a scale of 1 to 7 (administered by a person with a medical  
 243 degree).[51]

244 Disease activity in IBD will be estimated with either the (modified) Mayo Score[52] or  
 245 Crohn's Disease Activity Index[53] in patients with ulcerative colitis and Crohn's disease,  
 246 respectively, while tissue transglutaminase (tTG) levels will be used to measure the activity of  
 247 CeD. (Scores will be determined by the gastroenterologist enrolling the patient.)

1  
2  
3 248 Dietary adherence of CeD patients will be estimated through (1) a dietary interview  
4  
5 249 conducted by a trained dietitian on a scale of 1 to 10, (2) self-reporting,[54] (3) a test measuring  
6  
7 250 knowledge of gluten-free foods, (4) urine GIP detection (details in the text), and (5) celiac-  
8  
9 251 specific serology (tTG and endomysium antibody levels (EMA)).[55] Patients will be divided  
10  
11 252 into those with good and poor dietary adherence based on the complex assessment of the above-  
12  
13 253 mentioned data.

14 254 All laboratory tests will be performed in the same laboratory (University of Pécs, Hungary)  
15  
16 255 from venous blood. Blood samples will be collected in plastic tubes prospectively (2 x BD  
17  
18 256 Vacutainer 10.0 ml (red), 2 x BD Vacutainer 6.0 ml (purple), 1 x BD Vacutainer 3.0 ml (pink),  
19  
20 257 1 x BD Vacutainer 2.7 ml (blue), and 1 x BD Seditainer 5.0 ml (black) for a total of 42.7 ml  
21  
22 258 blood from each patient (BD, USA)).

23 259 We will measure:

- 24 260 • routine laboratory parameters: bilirubin, urea, creatinine, cholesterol (total, high-density  
25  
26 261 and low-density lipoproteins), triglyceride, aspartate, aspartate aminotransferase,  
27  
28 262 alanine aminotransferase, alkaline phosphatase, gamma-glutamyl transferase, total  
29  
30 263 protein, albumin, immunoglobulins, C-reactive protein, vitamin B<sub>12</sub>, folic acid,  
31  
32 264 homocysteine, blood counts, and erythrocyte sedimentation
- 33 265 • immunological indicators: antiphospholipid antibodies (lupus anticoagulant, cardiolipin  
34  
35 266 IgG/A/M, B2-glycoprotein-I IgG/A/M, prothrombin IgG/A/M) and celiac-specific  
36  
37 267 antibodies (tTG IgA/G, EMA IgA).
- 38 268 • hemostatic parameters: prothrombin, thrombin time, activated partial thromboplastin  
39  
40 269 time, fibrinogen, antithrombin activity, protein C activity, and protein S activity
- 41  
42 270 • hemorheological parameters: erythrocyte aggregation by Myrenne aggregometer  
43  
44 271 (model MA-1, Myrenne GmbH, Roetgen, Germany) and Laser-assisted Optical  
45  
46 272 Rotational Cell Analyzer (LORCA, R&R Mechatronics, Hoorn, The Netherlands);  
47  
48 273 erythrocyte deformability with laser-diffraction ektacytometry with a LORCA; and  
49  
50 274 viscosity of whole blood and plasma by Brookfield DV-III Ultra LV Programmable  
51  
52 275 rotational viscometer (Brookfield Engineering Labs; Middleboro, Mass., USA). The  
53  
54 276 Case Report Form providing data about the measurements is presented in  
55  
56 277 Supplementary material.

57 278 Strict adherence will be kept during the hemorheological tests to the guidelines proposed by  
58  
59 279 the International Expert Panel for Standardization of Hemorheological Methods.[56] The fact  
60  
280 that equipment for hemorheological measurements is not available in other centres in Hungary



281 and that blood samples must be processed within two hours of sampling without freezing  
282 restricted our expansion of this project to a multicentre study.

283 An extra tube will be collected and stored for further hemostatic measurements (e.g., clotting  
284 factors) if any abnormality of parameters measured is detected.

285 Midstream urine (at least 100 ml) will be collected in sterile urine sample containers.  
286 Samples will be stored at 4°C until transfer to the Biobank at the Institute for Translational  
287 Medicine, University of Pécs Medical School, on the day of sampling, where samples will be  
288 deep frozen at -80°C. After preparation, urine GIP detection will be performed with Biomedal  
289 (Spain) products.

290

## 291 **Outcomes**

### 292 1. Primary

- 293 • Hemorheological test results (erythrocyte aggregation and deformability, whole  
294 blood and plasma viscosity).

### 295 2. Secondary

- 296 • Hemostatic test results (antithrombin, protein C, protein S), folic acid, and  
297 homocysteine levels.

298

## 299 **Target number of patients**

300 This is a two-phase study. In the first phase, we will enrol 50 CeD and 50 IBD patients with  
301 50 age- and sex-matched control subjects; the case-control ratio will be 1:1:1, respectively.  
302 Then, an interim analysis will be performed to calculate the power for the analyses of the  
303 outcomes. If the power exceeds 80%, recruitment will be considered completed; otherwise,  
304 recruitment will continue until the desired power is reached.

305

## 306 **Patient and Public Involvement**

307 Before starting recruitment, randomly selected CeD and IBD patients reviewed the  
308 questionnaires and the information sheet designed to share details of the study for participants  
309 to facilitate better understanding.

310

## 311 **Blinding**

312 Blinding of personnel included in the study is presented in Table 4.

313

314 Table 4. Blinding of personnel included in the study

|                     | Physician enrolling patient | Physician administering questionnaires | Dietitian        | Laboratory personnel |
|---------------------|-----------------------------|----------------------------------------|------------------|----------------------|
| Disease activity    | N/A                         | Blinded                                | Blinded          | Blinded              |
| Questionnaires      | Blinded*                    | N/A                                    | Blinded          | Blinded              |
| Dietary interview   | Blinded*                    | Blinded                                | N/A <sup>#</sup> | Blinded              |
| Laboratory measures | Blinded*                    | Blinded                                | Blinded          | N/A                  |

315

316 N/A: not applicable.

317 \*The treating physician will immediately access data for safety reasons and act accordingly.

318 Patients will be informed of the laboratory results in a letter.

319 <sup>#</sup>Dietary education will be provided based on dietary adherence.

320

321 **Data management**

322 A subject identification number will be provided consecutively to every patient after  
 323 inclusion. Subject identification numbers with sensitive data on patients (including the name,  
 324 insurance number, and date of enrolment) will be stored in a locked file separately from other  
 325 data. De-identified data will be added to the source documentation stored in locked cabinets.  
 326 Source documentation will be entered in an electronic case report file (e-CRF). The Principal  
 327 Investigators will ensure that the data in an e-CRF are accurate, complete, and legible (range  
 328 checks for data values). E-CRFs will be stored on a secured server at the Institute for  
 329 Translational Medicine, University of Pécs Medical School. Access to data will be restricted  
 330 through a password system to personnel involved in data management. A three-level data check  
 331 will be continuously performed, and final data will be finally approved by the Principal  
 332 Investigator to ensure data quality.

333 To ensure precise data collection, administrative and medical staff members will be invited  
 334 to participate in training sessions to familiarize them with the study requirements, standardized  
 335 data recording, and biological specimen collection.

336 The de-identified dataset will be delivered for the purpose of sharing on request.

337

338 **Statistical Analysis**

339 First, descriptive statistics will entail a graphical presentation of data. Continuous variables  
 340 will be reported as a central tendency with a measure of dispersion, while categorical variables  
 341 will be reported as absolute and relative frequencies. Then, data will be analyzed with Student's  
 342 tests, methods of Variance Analysis, and regression models if data are normally distributed;  
 343 otherwise, non-parametric tests will be introduced. Chi-square or Fisher's tests will be used to  
 344 analyze categorical variables. Multivariate analysis will be used to take the most important  
 345 thrombotic factors into account (e.g., the use of oral contraceptives and immunosuppressants,

1  
2  
3 346 previous thrombotic history, smoking, comorbidities). A probability of less than .05 indicates  
4  
5 347 a statistically significant difference between groups.

6 348 Only patients with a full dataset in their hemorheological and hemostatic profile will be  
7  
8 349 included in the analysis. The following comparisons will be done: CeD vs. control, tTG+ CeD  
9  
10 350 vs. tTG- CeD, CeD with good dietary adherence vs. CeD with poor dietary adherence, IBD vs.  
11  
12 351 control, active IBD vs. remitting IBD, and Crohn's disease vs. ulcerative colitis.

13 352 An interim analysis is planned after recruiting the target number of the first phase to calculate  
14  
15 353 power. Audits are not necessary due to the case-control design.

16  
17 354

### 18 355 **Biobank and accessory research**

19  
20 356 After laboratory analysis, urine and blood (whole blood and plasma, at least 1 ml each)  
21  
22 357 residues will be stored in the Institute for Translational Medicine Biobank at -80°C for future  
23  
24 358 studies (for at least five years). Additional samples will not be taken for storage purposes.  
25  
26 359 Containers will be labelled with the subject identification number, and samples will be  
27  
28 360 completely de-identified.

29 361 CeD patients will be offered an opportunity to participate in the "Monitoring the prevalence,  
30  
31 362 symptoms, complications, and family history of celiac disease and the effect of a gluten-free  
32  
33 363 diet – Celiac registry" research project (approved by the Scientific and Research Ethics  
34  
35 364 Committee of the Medical Research Council, Ref No 45098-2/2016/EKU).

36 365

### 37 366 **Protocol amendments and disseminating policy**

38  
39 367 This protocol is the first version completed on 30 May 2018. If required, the online version  
40  
41 368 will be updated in the ISRCTN registry. Major modifications should be permitted by the  
42  
43 369 Regional and Local Research Ethics Committee.

44 370 The trial status is ongoing; recruitment began on 1 May 2018. The expected date of  
45  
46 371 completion is 31 May 2019.

47  
48 372

## 49 373 **DISCUSSION**

50  
51 374 Recent guidelines on CeD do not make any recommendations on how to prevent and manage  
52  
53 375 thrombotic events in CeD patients.[3, 47] Gluten-free diet, which is the only approved treatment  
54  
55 376 of the disease, may reduce or eliminate some thrombotic risk factors (e.g., consequences of  
56  
57 377 malabsorption and chronic inflammation) but it is uncertain whether the thrombotic risk  
58  
59 378 completely normalizes.[57] With respect to malabsorption, intestinal mucosa does not recover  
60  
379 in a high fraction of patients despite a long-term strict diet, particularly in those diagnosed in

1  
2  
3 380 the adulthood.[58] Whether CeD patients after a thrombotic event would benefit from a lifelong  
4  
5 381 anticoagulation therapy has remained unclear. The need for thromboprophylaxis under  
6  
7 382 prothrombotic circumstances, such as hospitalization, pregnancy, or immobilization should be  
8  
9 383 further investigated.

10 384 IBD guidelines recommend that thromboprophylaxis should be considered in all in- and  
11  
12 385 outpatients with an active disease.[59, 60] In addition to disease severity, the choice of  
13  
14 386 treatment influences the thrombotic risk as well.[17] A tool of personalized thrombotic risk  
15  
16 387 stratification including objective laboratory markers is awaited.

17 388 Our results can contribute to expanding our knowledge on the prothrombotic  
18  
19 389 pathophysiological alteration in CeD and IBD, thereby providing the basis for future research.

20 390

## 21 391 **ETHICS AND DISSEMINATION**

22  
23  
24 392 The study was approved by the Regional and Local Research Ethics Committee, University  
25  
26 393 of Pécs (Ref No 6917). Publication in a high-impact peer-reviewed journal is planned. We will  
27  
28 394 adhere to authorship criteria for manuscripts submitted for publication set by the International  
29  
30 395 Committee of Medical Journal Editors.

31 396

## 32 397 **REFERENCES**

- 33  
34 398 1. El-Gabalawy H, Guenther LC, Bernstein CN. Epidemiology of immune-mediated inflammatory  
35  
36 399 diseases: incidence, prevalence, natural history, and comorbidities. *J Rheumatol Suppl* 2010;85:2-10.  
37  
38 400 2. Pascual V, Dieli-Crimi R, Lopez-Palacios N, et al. Inflammatory bowel disease and celiac disease:  
39  
40 401 overlaps and differences. *World J Gastroenterol* 2014;20:4846-56.  
40 402 3. Bai JC, Ciacci C. World Gastroenterology Organisation Global Guidelines: Celiac Disease  
41  
42 403 February 2017. *J Clin Gastroenterol* 2017;51:755-68.  
41 404 4. Ludvigsson JF, Leffler DA, Bai JC, et al. The Oslo definitions for coeliac disease and related  
42  
43 405 terms. *Gut* 2013;62:43-52.  
43 406 5. Kurppa K, Paavola A, Collin P, et al. Benefits of a gluten-free diet for asymptomatic patients  
44  
45 407 with serologic markers of celiac disease. *Gastroenterology* 2014;147:610-7.e1.  
45 408 6. Zhang YZ, Li YY. Inflammatory bowel disease: pathogenesis. *World J Gastroenterol* 2014;20:91-  
46  
47 409 9.  
48 410 7. Molodecky NA, Soon IS, Rabi DM, et al. Increasing incidence and prevalence of the  
49  
50 411 inflammatory bowel diseases with time, based on systematic review. *Gastroenterology* 2012;142:46-  
51  
52 412 54.e42.  
51 413 8. Kaplan GG. The global burden of IBD: from 2015 to 2025. *Nat Rev Gastroenterol Hepatol*  
52  
53 414 2015;12:720-7.  
53 415 9. Ernst E, Hein A, Meurer M, et al. Blood rheology in lupus erythematosus. *Ann Rheum Dis*  
54  
55 416 1991;50:710-2.  
55 417 10. Shurkhina ES, Nesterenko VM, Lisovskaya IL, et al. Detection of stages of autoimmune  
56  
57 418 hemolytic anemia by evaluating erythrocyte deformability and density. *Bull Exp Biol Med*  
58  
59 419 2004;138:280-3.  
59 420 11. Spengler MI, Svetaz MJ, Leroux MB, et al. Erythrocyte aggregation in patients with systemic  
60  
61 421 lupus erythematosus. *Clin Hemorheol Microcirc* 2011;47:279-85.

12. Adams MJ, Palatinus AA, Harvey AM, et al. Impaired control of the tissue factor pathway of blood coagulation in systemic lupus erythematosus. *Lupus* 2011;20:1474-83.
13. Costallat LT, Ribeiro CC, Annichino-Bizzacchi JM. Antithrombin, protein S and protein C and antiphospholipid antibodies in systemic lupus erythematosus. *Sangre (Barc)* 1998;43:345-8.
14. Kordich LC, Forastiero RR, Basilotta E, et al. Natural inhibitors of blood coagulation and fibrinolysis in patients with lupus anticoagulant. *Blood Coagul Fibrinolysis* 1992;3:765-71.
15. Zoller B, Li X, Sundquist J, et al. Risk of pulmonary embolism in patients with autoimmune disorders: a nationwide follow-up study from Sweden. *Lancet* 2012;379:244-9.
16. Ungprasert P, Wijarnpreecha K, Tanratana P. Risk of venous thromboembolism in patients with celiac disease: A systematic review and meta-analysis. *J Gastroenterol Hepatol* 2016;31:1240-5.
17. Sarlos P, Szemes K, Hegyi P, et al. Steroid but not Biological Therapy Elevates the risk of Venous Thromboembolic Events in Inflammatory Bowel Disease: A Meta-Analysis. *J Crohns Colitis* 2018;12:489-98.
18. Chang HH, Chiang BL. The diagnosis and classification of autoimmune coagulopathy: an updated review. *Autoimmun Rev* 2014;13:587-90.
19. Park KH, Kim U, Choi KU, et al. Hemorheologic Alterations in Patients with Type 2 Diabetes Mellitus Presented with an Acute Myocardial Infarction. *Diabetes Metab J* 2018;42:155-63.
20. Vaya A, Rivera L, de la Espriella R, et al. Red blood cell distribution width and erythrocyte deformability in patients with acute myocardial infarction. *Clin Hemorheol Microcirc* 2015;59:107-14.
21. Zorio E, Murado J, Arizo D, et al. Haemorheological parameters in young patients with acute myocardial infarction. *Clin Hemorheol Microcirc* 2008;39:33-41.
22. Banerjee R, Nageswari K, Puniyani RR. Association of hemorheological parameters and risk of stroke in hypertensives of Indian origin. *Clin Exp Hypertens* 2000;22:687-94.
23. Wolberg AS, Aleman MM, Leiderman K, et al. Procoagulant activity in hemostasis and thrombosis: Virchow's triad revisited. *Anesth Analg* 2012;114:275-85.
24. Lerner A, Blank M. Hypercoagulability in celiac disease--an update. *Autoimmun Rev* 2014;13:1138-41.
25. Dumic I, Martin S, Salfiti N, et al. Deep Venous Thrombosis and Bilateral Pulmonary Embolism Revealing Silent Celiac Disease: Case Report and Review of the Literature. *Case Rep Gastrointest Med* 2017;2017:5236918.
26. Berthoux E, Fabien N, Chayvialle JA, et al. [Adult celiac disease with thrombosis: a case series of seven patients. Role of thrombophilic factors]. *Rev Med Interne* 2011;32:600-4.
27. Lerner A, Agmon-Levin N, Shapira Y, et al. The thrombophilic network of autoantibodies in celiac disease. *BMC Med* 2013;11:89.
28. Hallert C, Grant C, Grehn S, et al. Evidence of poor vitamin status in coeliac patients on a gluten-free diet for 10 years. *Aliment Pharmacol Ther* 2002;16:1333-9.
29. Shamir R, Shoenfeld Y, Blank M, et al. The prevalence of coeliac disease antibodies in patients with the antiphospholipid syndrome. *Lupus* 2003;12:394-9.
30. Johannesdottir SA, Erichsen R, Horvath-Puho E, et al. Coeliac disease and risk of venous thromboembolism: a nationwide population-based case-control study. *Br J Haematol* 2012;157:499-501.
31. Ciaccio EJ, Lewis SK, Biviano AB, et al. Cardiovascular involvement in celiac disease. *World J Cardiol* 2017;9:652-66.
32. Verma AK, Gatti S, Galeazzi T, et al. Gluten Contamination in Naturally or Labeled Gluten-Free Products Marketed in Italy. *Nutrients* 2017;9.
33. Mitu O, Alexandrescu DM, Catalina M, et al. Is there a cardiovascular risk in inflammatory bowel diseases? *Rev Med Chir Soc Med Nat Iasi* 2014;118:918-23.
34. Kristensen SL, Ahlehoff O, Lindhardsen J, et al. Disease activity in inflammatory bowel disease is associated with increased risk of myocardial infarction, stroke and cardiovascular death--a Danish nationwide cohort study. *PLoS One* 2013;8:e56944.
35. Cakal B, Gokmen A, Yalinkilic M, et al. Natural anticoagulant protein levels in Turkish patients with inflammatory bowel disease. *Blood Coagul Fibrinolysis* 2010;21:118-21.

- 1  
2  
3 474 36. Heneghan MA, Cleary B, Murray M, et al. Activated protein C resistance, thrombophilia, and  
4 475 inflammatory bowel disease. *Dig Dis Sci* 1998;43:1356-61.
- 5 476 37. Kohoutova D, Pecka M, Cihak M, et al. Prevalence of hypercoagulable disorders in  
6 477 inflammatory bowel disease. *Scand J Gastroenterol* 2014;49:287-94.
- 7 478 38. Yurekli BP, Aksoy DY, Aybar M, et al. The search for a common thrombophilic state during the  
8 479 active state of inflammatory bowel disease. *J Clin Gastroenterol* 2006;40:809-13.
- 9 480 39. Akman T, Akarsu M, Akpinar H, et al. Erythrocyte deformability and oxidative stress in  
10 481 inflammatory bowel disease. *Dig Dis Sci* 2012;57:458-64.
- 11 482 40. Novacek G, Vogelsang H, Genser D, et al. Changes in blood rheology caused by Crohn's disease.  
12 483 *Eur J Gastroenterol Hepatol* 1996;8:1089-93.
- 13 484 41. Zilberman L, Rogowski O, Rozenblat M, et al. Inflammation-related erythrocyte aggregation in  
14 485 patients with inflammatory bowel disease. *Dig Dis Sci* 2005;50:677-83.
- 15 486 42. Lobo AJ, Jones SC, Jubly LD, et al. Plasma viscosity in inflammatory bowel disease. *J Clin Pathol*  
16 487 1992;45:54-7.
- 17 488 43. Danese S, Papa A, Saibeni S, et al. Inflammation and coagulation in inflammatory bowel  
18 489 disease: The clot thickens. *Am J Gastroenterol* 2007;102:174-86.
- 19 490 44. Magro F, Soares JB, Fernandes D. Venous thrombosis and prothrombotic factors in  
20 491 inflammatory bowel disease. *World J Gastroenterol* 2014;20:4857-72.
- 21 492 45. Chan AW, Tetzlaff JM, Altman DG, et al. SPIRIT 2013 statement: defining standard protocol  
22 493 items for clinical trials. *Ann Intern Med* 2013;158:200-7.
- 23 494 46. Marta K, Szabo AN, Pecs D, et al. High versus low energy administration in the early phase of  
24 495 acute pancreatitis (GOULASH trial): protocol of a multicentre randomised double-blind clinical trial.  
25 496 *BMJ Open* 2017;7:e015874.
- 26 497 47. Husby S, Koletzko S, Korponay-Szabo IR, et al. European Society for Pediatric Gastroenterology,  
27 498 Hepatology, and Nutrition guidelines for the diagnosis of coeliac disease. *J Pediatr Gastroenterol Nutr*  
28 499 2012;54:136-60.
- 29 500 48. Rubio-Tapia A, Hill ID, Kelly CP, et al. ACG clinical guidelines: diagnosis and management of  
30 501 celiac disease. *Am J Gastroenterol* 2013;108:656-76.
- 31 502 49. Dignass A, Eliakim R, Magro F, et al. Second European evidence-based consensus on the  
32 503 diagnosis and management of ulcerative colitis part 1: definitions and diagnosis. *J Crohns Colitis*  
33 504 2012;6:965-90.
- 34 505 50. Dignass A, Van Assche G, Lindsay JO, et al. The second European evidence-based Consensus on  
35 506 the diagnosis and management of Crohn's disease: Current management. *J Crohns Colitis* 2010;4:28-  
36 507 62.
- 37 508 51. Svedlund J, Sjodin I, Dotevall G. GSRS--a clinical rating scale for gastrointestinal symptoms in  
38 509 patients with irritable bowel syndrome and peptic ulcer disease. *Dig Dis Sci* 1988;33:129-34.
- 39 510 52. Schroeder KW, Tremaine WJ, Ilstrup DM. Coated oral 5-aminosalicylic acid therapy for mildly  
40 511 to moderately active ulcerative colitis. A randomized study. *N Engl J Med* 1987;317:1625-9.
- 41 512 53. Modigliani R, Mary JY, Simon JF, et al. Clinical, biological, and endoscopic picture of attacks of  
42 513 Crohn's disease. Evolution on prednisolone. Groupe d'Etude Therapeutique des Affections  
43 514 Inflammatoires Digestives. *Gastroenterology* 1990;98:811-8.
- 44 515 54. Silvester JA, Weiten D, Graff LA, et al. Living gluten-free: adherence, knowledge, lifestyle  
45 516 adaptations and feelings towards a gluten-free diet. *J Hum Nutr Diet* 2016;29:374-82.
- 46 517 55. Hindryckx P, Levesque BG, Holvoet T, et al. Disease activity indices in coeliac disease:  
47 518 systematic review and recommendations for clinical trials. *Gut* 2018;67:61-9.
- 48 519 56. Baskurt OK, Boynard M, Cokelet GC, et al. New guidelines for hemorheological laboratory  
49 520 techniques. *Clin Hemorheol Microcirc* 2009;42:75-97.
- 50 521 57. Beyrouti R, Mansour M, Kacem A, et al. Recurrent cerebral venous thrombosis revealing celiac  
51 522 disease: an exceptional case report. *Acta Neurol Belg* 2017;117:341-3.
- 52 523 58. Szakacs Z, Matrai P, Hegyi P, et al. Younger age at diagnosis predisposes to mucosal recovery  
53 524 in celiac disease on a gluten-free diet: A meta-analysis. *PLoS One* 2017;12:e0187526.
- 54  
55  
56  
57  
58  
59  
60

- 1  
2  
3 525 59. Gionchetti P, Dignass A, Danese S, et al. 3rd European Evidence-based Consensus on the  
4 526 Diagnosis and Management of Crohn's Disease 2016: Part 2: Surgical Management and Special  
5 527 Situations. *J Crohns Colitis* 2017;11:135-49.  
6 528 60. Nguyen GC, Bernstein CN, Bitton A, et al. Consensus statements on the risk, prevention, and  
7 529 treatment of venous thromboembolism in inflammatory bowel disease: Canadian Association of  
8 530 Gastroenterology. *Gastroenterology* 2014;146:835-48.e6.

10 531

## 11 532 **AUTHORS' CONTRIBUTIONS**

12 533 JB is the Principal Investigator. ZS is the Trial Coordinator. ZS, PH, JB, ÁV, and KT  
13 534 conceptualized the study, drafted, and revised this manuscript. NF and EB planned and drafted  
14 535 the statistical analysis. PS, JB, BE, and ÁV provided us with special expertise in the  
15 536 management of celiac disease and inflammatory bowel patients. BC and PK are performing the  
16 537 hemorheological measurements and interpreting the results. AH, ÁN, TB, and MTF provided  
17 538 us with special expertise in hemostatic and immunological measurements. BK is contributing  
18 539 significantly to the biochemical analyses. IV planned and is carrying out the dietary assessment  
19 540 of the celiac patients. KM, AS, ZS, and PH are responsible for data management, administrative  
20 541 coordination, and biological sampling; they drafted and revised the manuscript. All the authors  
21 542 have read and approved the final manuscript.

22 543

## 23 544 **FUNDING STATEMENT**

24 545 The project is non-industry-funded. Study and centre costs are covered by the University of  
25 546 Pécs Medical School, by a Momentum Grant from the Hungarian Academy of Sciences  
26 547 (LP2014-10/2014), by a Highly Cited Publication Grant (KH 125678) from the National  
27 548 Research Development and Innovation Office, by GINOP 2.3.2-15-2016-00048 Stay Alive,  
28 549 EFOP-3.6.2-16-2017-0006, and EFOP-3.6.3-VEKOP-16-2017-00009; and by the Translational  
29 550 Medicine Foundation. In addition, this project is supported by the ÚNKP-17-3-II and ÚNKP-  
30 551 18-3-I New National Excellence Programme, Ministry of Human Capacities.

31 552 Funders have no influence on preparations, course, interpretation, or publication of results.

32 553

## 33 554 **COMPETING INTEREST STATEMENT**

34 555 Nothing to declare.

**Case Report Form - hemorheological studies**

**HERMES**

**Date and time** (MM:HH DD:MM:YYYY): .....

**Hematocrit (%)**: .....

**Red blood cell aggregation** (Myrenne aggregometer)<sup>1</sup>:

|                 | First sample |  |  | Second sample |  |  | Mean |
|-----------------|--------------|--|--|---------------|--|--|------|
| <b>M index</b>  |              |  |  |               |  |  |      |
| <b>M1 index</b> |              |  |  |               |  |  |      |

**Red blood cell aggregation** (LORCA)<sup>2</sup>:

**AI (%)**: ..... **t ½ (s)**: ..... **γ: (1/s)** .....

**Red blood cell deformability** (LORCA)<sup>3</sup>:

| EI <sub>30</sub> | EI <sub>16.87</sub> | EI <sub>9.49</sub> | EI <sub>5.33</sub> | EI <sub>3</sub> | EI <sub>1.69</sub> | EI <sub>0.95</sub> | EI <sub>0.53</sub> | EI <sub>0.3</sub> |
|------------------|---------------------|--------------------|--------------------|-----------------|--------------------|--------------------|--------------------|-------------------|
|                  |                     |                    |                    |                 |                    |                    |                    |                   |

**Viscosity of whole blood** (Brookfield viscometer, mPa·s)<sup>4</sup>: .....

**Viscosity of plasma** (Brookfield viscometer, mPa·s)<sup>4</sup>: .....



1  
2  
3<sup>1</sup>The Myrenne aggregometer (model MA-1, Myrenne GmbH, Roetgen, Germany) consists of a  
4 laser diode, a transparent upper plate, and a transparent lower rotating cone (i.e., shearing unit).  
5 A sample (30  $\mu\text{l}$  red blood cell suspension) is placed between the gap of the upper plate and the  
6 rotating cone. Then, the rotating cone shears the red blood cells at  $600\text{ s}^{-1}$  to disaggregate pre-  
7 existing aggregates. The cone then suddenly stops moving (**M index or aggregation at stasis**)  
8 or continues to rotate (**M1 index or aggregation at low shear**) and shear at  $3\text{ s}^{-1}$  while  
9 measuring the intensity of transmitted infrared light for 10 s. If the red blood cells tend to  
10 aggregate, the light transmittance of the sample increases (as well as M and M1 indices).  
11 Measurements are carried out at room temperature three times from two samples.  
12  
13

14<sup>2</sup>The Laser-assisted Optical Rotational Cell Analyzer (LORCA, R&R Mechatronics, Hoorn,  
15 The Netherlands) consists of a glass cup and a perfectly fitting bob with a 0.3 mm gap in  
16 between. The red blood cell suspension is placed in this gap. The disaggregation of the sample  
17 is carried out at  $500\text{ s}^{-1}$  shear. Following the release, a red laser beam is directed to the sample  
18 and the reflection is measured by photodiodes for 120 s. **Aggregation index (AI)** is calculated  
19 by the integral of the change in reflection (intensity of light) during the first 10 s corrected to  
20 the possible maximal change.  $T_{1/2}$  defines the time required for achieving the half of the  
21 maximal aggregation. The threshold shear rate is the lowest shear rate that can maintain  
22 complete disaggregation ( $\gamma$ ). Measurements are carried out at room temperature.  
23  
24

25<sup>3</sup>Red blood cells are exposed to shear stress on ektacytometry (with LORCA, R&R  
26 Mechatronics, Hoorn, The Netherlands), then the change in shape is quantified. LORCA  
27 consists of a rotating glass cup with a fitting bob, which provides a nearly homogenous shearing  
28 field. Low hematocrit (0.2%) is required for the measurement; therefore, we suspend them in a  
29 medium with known viscosity (25  $\mu\text{l}$  blood/5 ml volume). The exposure of red blood cells to  
30 shear stress results in the transition of the normally biconcave shape to an ellipsoid one. The  
31 deformed cells are examined with a laser beam causing diffraction. The **elongation index (EI)**  
32 quantifies the deformation of the red blood cells ( $\text{EI}=(A-B)/(A+B)$ , where A and B represent  
33 the major and the minor axes of the ellipsoids). EI can be determined at various shear stresses,  
34 the set of shear stress-elongation index is the so-called ektacytogram. Shear stresses range from  
35 0.3 to 30.0 kPa (e.g., **EI<sub>0.3</sub>**, **EI<sub>3</sub>**). Measurements are carried out at room temperature.  
36  
37

38<sup>4</sup>Viscosity of the whole blood and plasma is determined by Brookfield DV-III Ultra LV  
39 Programmable rotational viscometer (Brookfield Engineering Labs; Middleboro, Mass., USA).  
40 A spindle is immersed in the sample that the torque required to rotate it is measured. The **torque**  
41 is proportional to the viscosity measured at mid-shear ( $90\text{ s}^{-1}$  or 12 rpm) in our study.  
42 Measurements are carried out at  $37^\circ\text{C}$ .  
43  
44  
45  
46  
47  
48  
49  
50  
51  
52  
53  
54  
55  
56  
57  
58  
59  
60
