# Supplementary material for: Haemorheological and haemostatic alterations in coeliac disease and inflammatory bowel disease in comparison with non-coeliac, non-IBD subjects (HERMES): a case–control study protocol
Source: PubMed Central journal article supplement — BMJ Open. 2019 Mar 23;9(3):e026315. doi: 10.1136/bmjopen-2018-026315 (PMC6475350; doi:10.1136/bmjopen-2018-026315), 2019-03-23
Supplement: bmjopen-2018-026315supp001.pdf [file bmjopen-2018-026315supp001.pdf]

**Case Report Form - hemorheological studies**

**HERMES**

**Date and time** (MM:HH DD:MM:YYYY): .....

**Hematocrit (%)**: .....

**Red blood cell aggregation (Myrenne aggregometer)<sup>1</sup>**:

|                 | First sample |  |  | Sacond sample |  |  | Mean |
|-----------------|--------------|--|--|---------------|--|--|------|
| <b>M index</b>  |              |  |  |               |  |  |      |
| <b>M1 index</b> |              |  |  |               |  |  |      |

**Red blood cell aggregation (LORCA)<sup>2</sup>**:

**AI (%)**: ..... **t ½ (s)**: ..... **γ: (1/s)** .....

**Red blood cell deformability (LORCA)<sup>3</sup>**:

| EI <sub>30</sub> | EI <sub>16.87</sub> | EI <sub>9.49</sub> | EI <sub>5.33</sub> | EI <sub>3</sub> | EI <sub>1.69</sub> | EI <sub>0.95</sub> | EI <sub>0.53</sub> | EI <sub>0.3</sub> |
|------------------|---------------------|--------------------|--------------------|-----------------|--------------------|--------------------|--------------------|-------------------|
|                  |                     |                    |                    |                 |                    |                    |                    |                   |

**Viscosity of whole blood** (Brookfield viscometer, mPa·s)<sup>4</sup>: .....

**Viscosity of plasma** (Brookfield viscometer, mPa·s)<sup>4</sup>: .....

<sup>1</sup>The Myrenne aggregometer (model MA-1, Myrenne GmbH, Roetgen, Germany) consists of a laser diode, a transparent upper plate, and a transparent lower rotating cone (i.e., shearing unit). A sample (30  $\mu\text{l}$  red blood cell suspension) is placed between the gap of the upper plate and the rotating cone. Then, the rotating cone shears the red blood cells at  $600\text{ s}^{-1}$  to disaggregate pre-existing aggregates. The cone then suddenly stops moving (**M index or aggregation at stasis**) or continues to rotate (**M1 index or aggregation at low shear**) and shear at  $3\text{ s}^{-1}$  while measuring the intensity of transmitted infrared light for 10 s. If the red blood cells tend to aggregate, the light transmittance of the sample increases (as well as M and M1 indices). Measurements are carried out at room temperature three times from two samples.

<sup>2</sup>The Laser-assisted Optical Rotational Cell Analyzer (LORCA, R&R Mechatronics, Hoorn, The Netherlands) consists of a glass cup and a perfectly fitting bob with a 0.3 mm gap in between. The red blood cell suspension is placed in this gap. The disaggregation of the sample is carried out at  $500\text{ s}^{-1}$  shear. Following the release, a red laser beam is directed to the sample and the reflection is measured by photodiodes for 120 s. **Aggregation index (AI)** is calculated by the integral of the change in reflection (intensity of light) during the first 10 s corrected to the possible maximal change.  $T_{1/2}$  defines the time required for achieving the half of the maximal aggregation. The threshold shear rate is the lowest shear rate that can maintain complete disaggregation ( $\gamma$ ). Measurements are carried out at room temperature.

<sup>3</sup>Red blood cells are exposed to shear stress on ektacytometry (with LORCA, R&R Mechatronics, Hoorn, The Netherlands), then the change in shape is quantified. LORCA consists of a rotating glass cup with a fitting bob, which provides a nearly homogenous shearing field. Low hematocrit (0.2%) is required for the measurement; therefore, we suspend them in a medium with known viscosity (25  $\mu\text{l}$  blood/5 ml volume). The exposure of red blood cells to shear stress results in the transition of the normally biconcave shape to an ellipsoid one. The deformed cells are examined with a laser beam causing diffraction. The **elongation index (EI)** quantifies the deformation of the red blood cells ( $EI=(A-B)/(A+B)$ , where A and B represent the major and the minor axes of the ellipsoids). EI can be determined at various shear stresses, the set of shear stress-elongation index is the so-called ektacytogram. Shear stresses range from 0.3 to 30.0 kPa (e.g., **EI<sub>0.3</sub>**, **EI<sub>3</sub>**). Measurements are carried out at room temperature.

<sup>4</sup>Viscosity of the whole blood and plasma is determined by Brookfield DV-III Ultra LV Programmable rotational viscometer (Brookfield Engineering Labs; Middleboro, Mass., USA). A spindle is immersed in the sample that the torque required to rotate it is measured. The **torque** is proportional to the viscosity measured at mid-shear ( $90\text{ s}^{-1}$  or 12 rpm) in our study. Measurements are carried out at  $37^\circ\text{C}$ .
